# Supplementary material for: Heterointerface promoted trifunctional electrocatalysts for all temperature high-performance rechargeable Zn–air batteries
Source: Royal Society of Chemistry journal article supplement (doi:10.1039/d3nh00108c), 2023-01-01
Supplement: d3nh00108c1.pdf [file d3nh00108c1.pdf]

## SUPPLEMENTARY INFORMATION

### **Heterointerface promoted trifunctional electrocatalysts for all temperature high-performance rechargeable Zn-air batteries**

Nayantara K. Wagh<sup>1#</sup>, Dong-Hyung Kim<sup>1#</sup>, Chi Ho Lee<sup>2</sup>, Sung-Hae Kim<sup>1</sup>, Han-Don Um<sup>3</sup>,  
Joseph Sang-Il Kwon<sup>2</sup>, Sambhaji S. Shinde<sup>1\*</sup>, Sang Uck Lee<sup>4</sup>, Jung-Ho Lee<sup>1\*</sup>

<sup>1</sup>Department of Materials Science and Chemical Engineering, Hanyang University, Ansan, Republic of Korea

<sup>2</sup>Artie McFerrin Department of Chemical Engineering, Texas A&M University, College Station, Texas 77843, United States; Texas A&M Energy Institute, College Station, Texas 77843, United States.

<sup>3</sup>Department of Chemical Engineering, Kangwon National University, Chuncheon, Gangwon-do 24341, Republic of Korea.

<sup>4</sup>School of Chemical Engineering, Sungkyunkwan University, 2066 Seobu-ro, Jangan-gu, Suwon, Gyeonggi-do 16419, Republic of Korea.

#### List of Contents

##### 1. Supplementary experimental methods

**Catalyst fabrication**

**Characterization of the prepared catalysts**

**Oxygen reduction reaction kinetics**

**Fabrication of Zn-air batteries (ZABs)**

##### 2. Computational details and modeling

**OER and ORR reaction pathways**

**Derivation of the free energy relations**

**Free energy diagram (FED) and overpotential ( $\eta$ )**

**Supplementary Figures**

**Supplementary Tables**

**Supplementary References**

## **1. Supplementary experimental methods**

### **Catalyst fabrication**

**Chemicals:** Cobalt (II) chloride dehydrate ( $\text{CoCl}_2 \cdot 2\text{H}_2\text{O}$ ), Tin (II) chloride dihydrate ( $\text{SnCl}_2 \cdot 2\text{H}_2\text{O}$ ), Sodium sulfide ( $\text{Na}_2\text{S}$ ), Graphite powder, poly(N-vinyl-2-pyrrolidone) ( $M_w = 40,000$ ), Chloroplatinic acid ( $\text{H}_2\text{PtCl}_6 \cdot 6\text{H}_2\text{O}$ ), Potassium permanganate ( $\text{KMnO}_4$ ), and Nafion were obtained with the Sigma-Aldrich. N,N-Dimethylformamide ( $\text{C}_3\text{H}_7\text{ON}$ ), ethanol ( $\text{C}_2\text{H}_5\text{OH}$ ), acetone, sodium hydroxide ( $\text{NaOH}$ ), potassium hydroxide ( $\text{KOH}$ ), sulfuric acid ( $\text{H}_2\text{SO}_4$ ), zinc acetate ( $\text{Zn}(\text{OAc})_2$ ), and nitric acid ( $\text{HNO}_3$ ) were attained from Daejung Chemicals. Carbon paper and stainless steel mesh (Spectra carb 2040-A, Fuel Cell Store), and Zn plate (Sigma-Aldrich, USA) were used as received. All precursors were used without further purifications. Deionized water was utilized as solvent until otherwise specifically mentioned. Acquired resources were applied further without distillation.

### **Synthesis of reference Pt/C catalysts**

$\text{H}_2\text{PtCl}_6 \cdot 6\text{H}_2\text{O}$  was reacted with an appropriate amount of poly(N-vinyl-2-pyrrolidone) ( $M_w = 40,000$ ) solution under vigorous stirring, followed by the addition of activated carbon. After that, the sodium borohydride ( $\text{NaBH}_4$ ) solution was appended to the reaction mixture under stirring for 30 min. Finally, the obtained mixture was collected after centrifugation, several times cleanings with deionized water, and dried at  $60\text{ }^\circ\text{C}$  for 12 h.

### **Synthesis of the $\text{RuO}_2$ catalysts**

The 50 mM ruthenium (III) chloride hydrate was dispersed in the mixture of deionized water and methyl alcohol (1:1 v/v) under continuous rotations. Further, the 2 M  $\text{NaOH}$  was injected drop-by-drop into the above reaction mixture until the pH of the solution became 7. The obtained product was centrifuged, rinsed with deionized water, and dehydrated at  $60\text{ }^\circ\text{C}$ , followed by annealing at  $500\text{ }^\circ\text{C}$  for 5 h in air.

### **Characterization of the prepared catalysts**

Powder X-ray diffraction (PXRD) patterns were measured on Rigaku Smartlab D/max 2500Pc diffractometer with  $\text{Cu K}\alpha$  radiation (wavelength of  $1.5406\text{ \AA}$ ). Morphology images were performed by field-emission scanning electron microscopy (FESEM, JEOL-6700F). Transmission electron microscopy (TEM) images were acquired on a Cs-corrected Titan<sup>TM</sup> 80-300 with an accelerating voltage of 80 kV. Elemental composition maps were recorded by

an EDS attached to the TEM. Raman spectra were measured on a RM 1000 (Ranishaw, UK) spectrometer. X-ray photoelectron spectroscopy (XPS) was performed on a VG SCIENTA (R 3000) spectrometer equipped with a monochromatic Al  $K\alpha$  source.

### Electrochemical measurements

The electrochemical performances were performed on an electrochemical workstation (CHI 760 D, CH Instruments) at room temperature with a typical three-electrode electrochemical cell. The Ag/AgCl (with saturated KCl) reference electrode, a graphite rod as the counter electrode, a glassy carbon (GC) rotating disk electrode (RDE, 0.196 cm<sup>2</sup>) coated with the catalysts as the working electrode, and 0.1 M aqueous KOH (oxygen-rich) as the electrolyte. The working electrode was fabricated with as-obtained SnS<sub>2- $\delta$</sub>  or CoS<sub>1- $\delta$</sub>  or CoS<sub>1- $\delta$</sub> /SnS<sub>2- $\delta$</sub>  catalysts placed over the GC using Nafion adhesive (5 wt%, 2  $\mu$ l) and then dried at room temperature for several hours. For comparison, Pt/C and RuO<sub>2</sub> reference materials inks were prepared by dispersing 10 mg of catalysts in the propanol of 1.95 ml and Nafion of 50  $\mu$ l. Then, 4  $\mu$ L of the prepared inks were evenly loaded on the GC surface and dried at room temperature. Mass loading for both fabricated catalysts was fixed to be 0.10 mg cm<sup>-2</sup> for both oxygen reactions. Prior to the ORR/OER measurements, the electrolyte (0.1 M KOH) was saturated by oxygen, and nitrogen flow for 30 min. LSV profiles for ORR/OER were obtained for 1600 rpm with a scan rate of 5 mV s<sup>-1</sup> in the potential range of 0.2–2 V vs. RHE. Chronoamperometric half-cell reactions durability was evaluated at the respective overpotentials for OER and half-wave potential for ORR. The measured potentials were referenced to the reversible hydrogen electrode (RHE) according to the Nernst equation,

$$E_{\text{RHE}} = E_{\text{Ag/AgCl}} + 0.059 \times \text{pH} + 0.205 \quad (\text{S1})$$

Performed current densities were also referenced according to the measured geometric surface areas. Electrochemical impedance spectra were obtained for the frequency range of 100 Hz to 1 MHz with a constant bias of 0.2 V. The long-life durability of the catalysts was measured by continuous potentiodynamic sweeps for a scan rate of 100 mV s<sup>-1</sup>. Mass loading of CoS<sub>1- $\delta$</sub> /SnS<sub>2- $\delta$</sub>  catalysts, reference Pt/C, and RuO<sub>2</sub> has been placed similarly unless otherwise stated (0.1 mg cm<sup>-2</sup>).

### Oxygen reduction reaction kinetics

The ORR kinetics were evaluated by using different rotational speed LSV profiles. The measured total current density is the sum of the inverse of kinetic current ( $J_K$ ) and diffusion

current ( $J_d$ ). Every atom or ion on the electrode reacts immediately as the applied overpotential is sufficiently high. The number of oxygen molecules at the electrode surface is almost zero, facilitating a diffusion-limiting plateau. Therefore, the diffusion current is related only to the RDE rotational speeds.

The transferred electron number ( $n$ ) in oxygen reduction was determined according to the Koutecky–Levich (K–L) equation<sup>S1-S3</sup>:

$$\frac{1}{J} = \frac{1}{J_K} + \frac{1}{B\omega^{1/2}} \quad (\text{S2})$$

$$B = 0.2nF(D_{O_2})^{2/3}\nu^{-1/6}C_{O_2} \quad (\text{S3})$$

where  $B$  represents the Levich slope,  $J_K$  represents the kinetic current,  $J$  represents the measured total current,  $\omega$  represents the electrode rotation rate,  $n$  represents the number of electrons transferred for each oxygen molecule,  $F$  represents the Faraday constant ( $F = 96485$  C mol<sup>-1</sup>),  $D_{O_2}$  represents the O<sub>2</sub> diffusion coefficient in 0.1 M KOH ( $D_{O_2} = 1.9 \times 10^{-5}$  cm<sup>2</sup> s<sup>-1</sup>),  $\nu$  represents the kinetic viscosity (0.01 cm<sup>2</sup> s<sup>-1</sup>) and  $C_{O_2}$  represents the concentration of O<sub>2</sub> ( $C_{O_2} = 1.2 \times 10^{-6}$  mol cm<sup>-3</sup>). The considered rotation speeds are in rpm, and therefore, the constant factor 0.2 is multiplied. The peroxide species during ORR reactions were determined by measuring the RRDE polarization profiles for the ring potential of 1.3 V vs. RHE. Based on the following expressions, the transferred electron number ( $n$ ) and peroxide (H<sub>2</sub>O<sub>2</sub>) yield were evaluated as<sup>S4</sup>:

$$n = 4 \frac{I_d}{I_d + I_r/N} \quad (\text{S4})$$

and

$$H_2O_2^- (\%) = 100 \frac{2I_r/N}{I_d + I_r/N} \quad (\text{S5})$$

where  $I_r$  represents the ring current,  $I_d$  represents the disk current, and  $N$  represents the current collection efficiency of the Pt ring.  $N$  was determined to be 0.42.

## **Fabrication of Zn-air batteries (ZABs)**

### **Alkaline Zn–air batteries**

The alkaline rechargeable ZABs were analyzed using the home-constructed electrochemical cells. Air cathodes were constructed by uniform mixing of CoS<sub>1-δ</sub>/SnS<sub>2-δ</sub> catalysts, carbon black, and polytetrafluoroethylene binder (8:1:1) and carbon paper was utilized as current collectors. Further, for comparison, Pt/C + RuO<sub>2</sub> catalyst slurry was fabricated by mixing

carbon black, polytetrafluoroethylene, and the catalysts (1:1:8 w/w) in ethanol/Nafion solution. The mass loadings of the  $\text{CoS}_{1.8}/\text{SnS}_{2.8}$  and reference Pt/C+ $\text{RuO}_2$  catalysts for alkaline ZABs was  $1 \text{ mg cm}^{-2}$ . The mass ratio of reference Pt/C and  $\text{RuO}_2$  was 1:1. Here, 6 M KOH with 0.2 M zinc acetate was used as the liquid electrolyte for the reversible electrochemical reactions. Catalyst-loaded (Pt/C+ $\text{RuO}_2$ ) carbon paper was used as an air cathode and a polished Zn plate (0.5 mm thickness) as anode.

### **Flexible solid-state Zn–air batteries**

Flexible ZABs were assembled with  $\text{CoS}_{1.8}/\text{SnS}_{2.8}$  catalysts coated stainless steel mesh as the air cathodes (8:1:1 composition for catalysts, carbon black and polytetrafluoroethylene binder), the chitosan biocellulosics (CBCs fabricated as per our previous reference<sup>1</sup>) as the solid electrolyte (70  $\mu\text{m}$ ), and Zn foil (0.3 mm) as the anode. Then,  $\text{CoS}_{1.8}/\text{SnS}_{2.8}$  based catalysts and zinc foils were situated on the opposite sides of the CBCs electrolyte. Finally, the fabricated devices were pressed cautiously and encapsulated with sustainable latex. For comparison, Pt/C +  $\text{RuO}_2$  catalyst slurry was also fabricated by mixing carbon black, polytetrafluoroethylene, and the catalysts (1:1:8 w/w) in ethanol/Nafion solution. The mass loadings of the  $\text{CoS}_{1.8}/\text{SnS}_{2.8}$  and reference Pt/C+ $\text{RuO}_2$  catalysts for rechargeable ZABs was  $2 \text{ mg cm}^{-2}$  and electrode area of  $2 \text{ cm}^2$ .

### **Battery testing**

Note all the measurements were carried out in ambient conditions. The galvanostatic discharge and charge voltage profiles were conducted on a WONATEC multichannel battery testing system. The cycling for alkaline and flexible solid ZABs was performed for 10 min per cycle (charge: 5 min; discharge: 5 min) for current densities of 10 and  $25 \text{ mA cm}^{-2}$ , respectively. The specific capacities were determined using the galvanostatic discharge profiles standardized to the utilized mass of Zn. The energy efficiency was calculated from the ratio of discharge to charge voltages. The power densities of both ZABs were calculated by expression as  $P = V \times I$ .

## Supplementary Figures

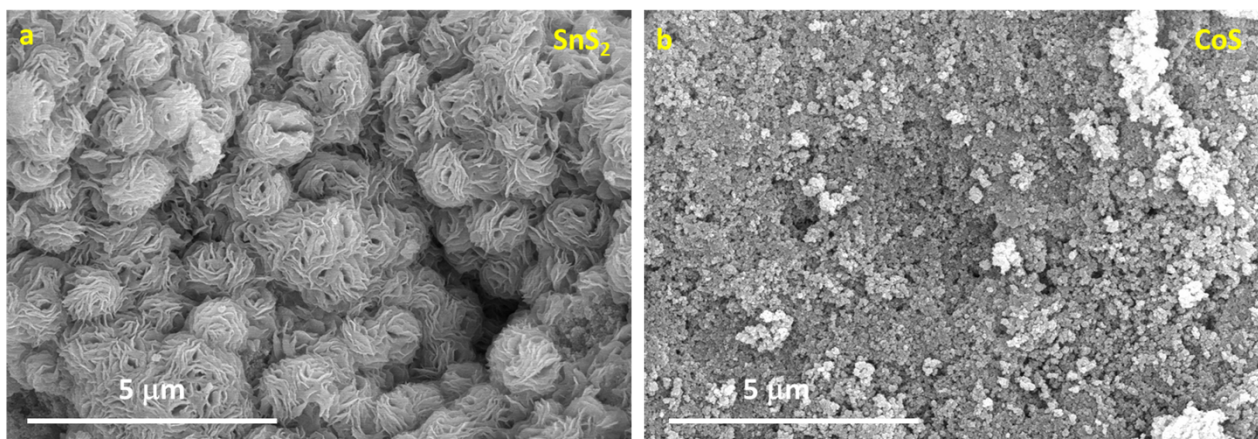

**Figure S1. Microscopic characterizations.** SEM images for fabricated pristine SnS<sub>2</sub> and CoS catalysts.

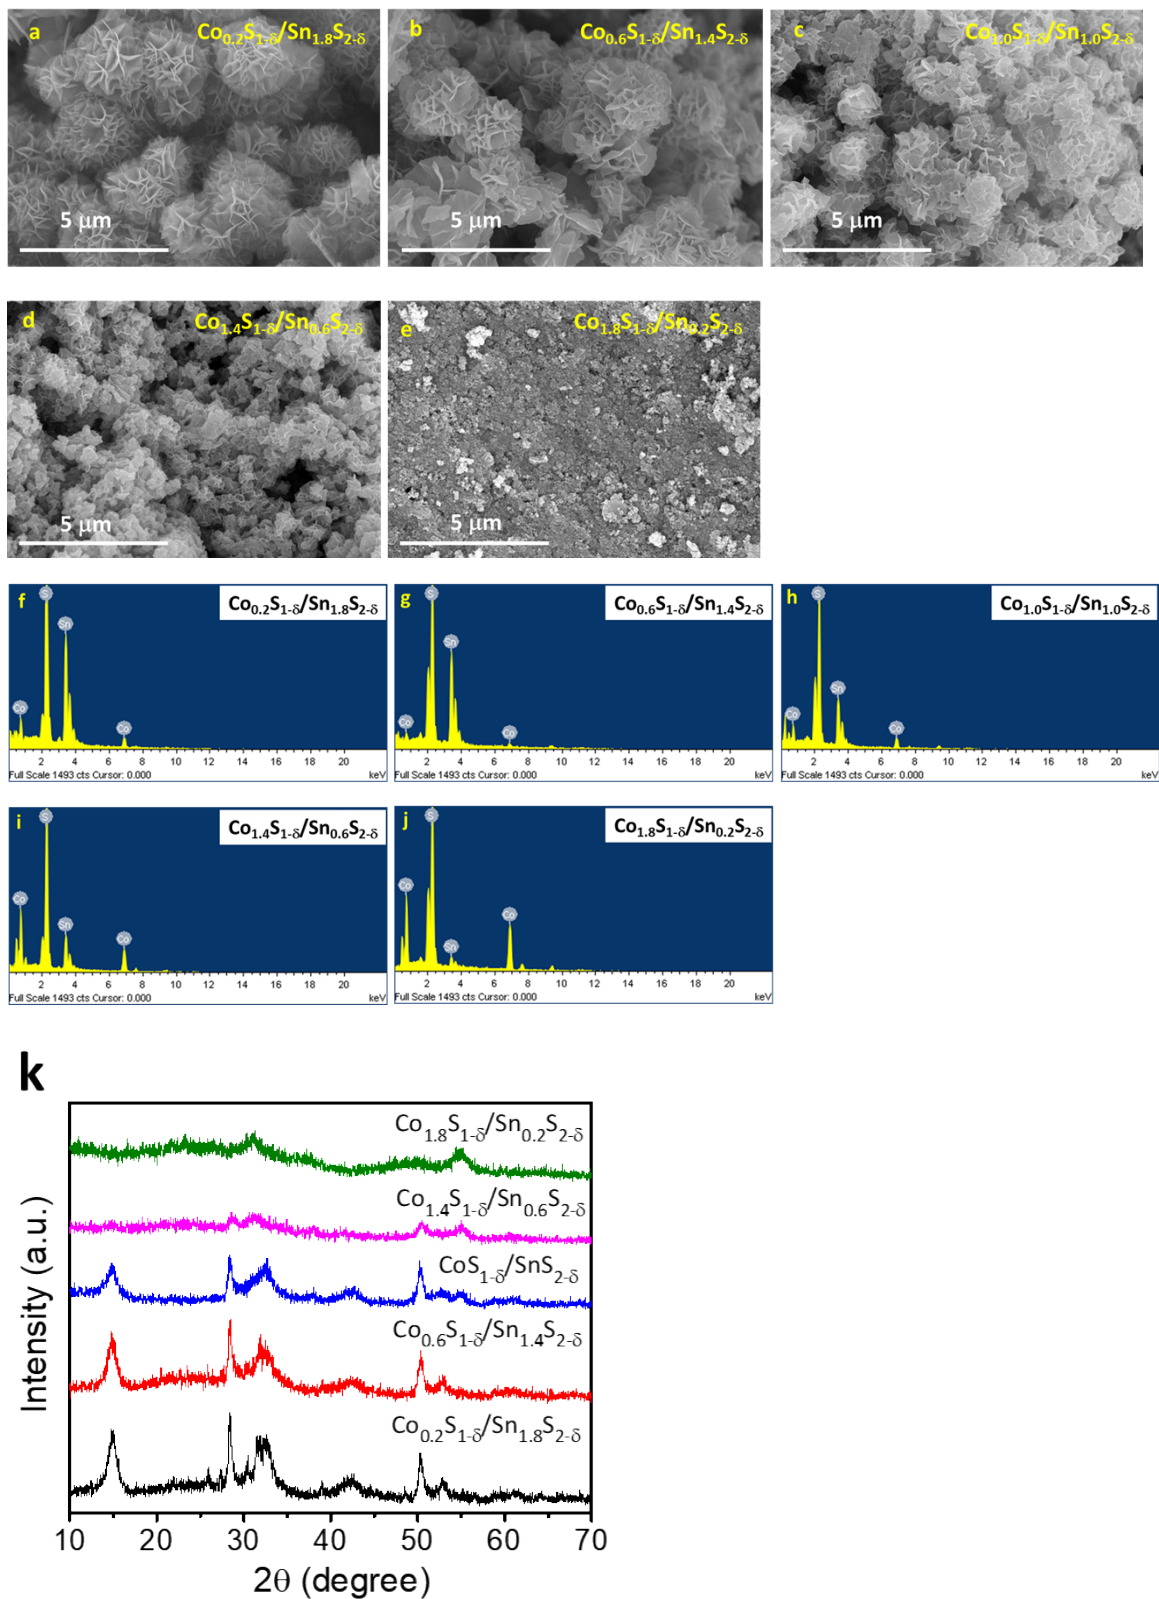

**Figure S2. Microscopic characterizations.** (a-e) SEM images, (f-j) EDS spectra, and (k) XRD patterns for fabricated  $\text{Co}_{0.2}\text{S}_{1-\delta}/\text{Sn}_{1.8}\text{S}_{2-\delta}$ ,  $\text{Co}_{0.6}\text{S}_{1-\delta}/\text{Sn}_{1.4}\text{S}_{2-\delta}$ ,  $\text{Co}_{1.0}\text{S}_{1-\delta}/\text{Sn}_{1.0}\text{S}_{2-\delta}$ ,  $\text{Co}_{1.4}\text{S}_{1-\delta}/\text{Sn}_{0.6}\text{S}_{2-\delta}$ , and  $\text{Co}_{1.8}\text{S}_{1-\delta}/\text{Sn}_{0.2}\text{S}_{2-\delta}$  hetero-interface based catalysts with varying composition from 0.2 to 1.8 for Co and Sn, respectively.

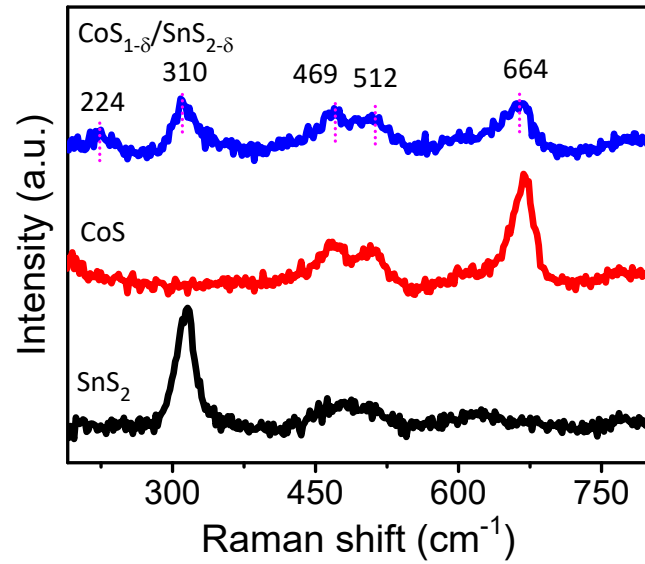

**Figure S3. Spectroscopic characterization.** Raman spectra for SnS<sub>2</sub>, CoS, and CoS<sub>1-δ</sub>/SnS<sub>2-δ</sub> catalysts.

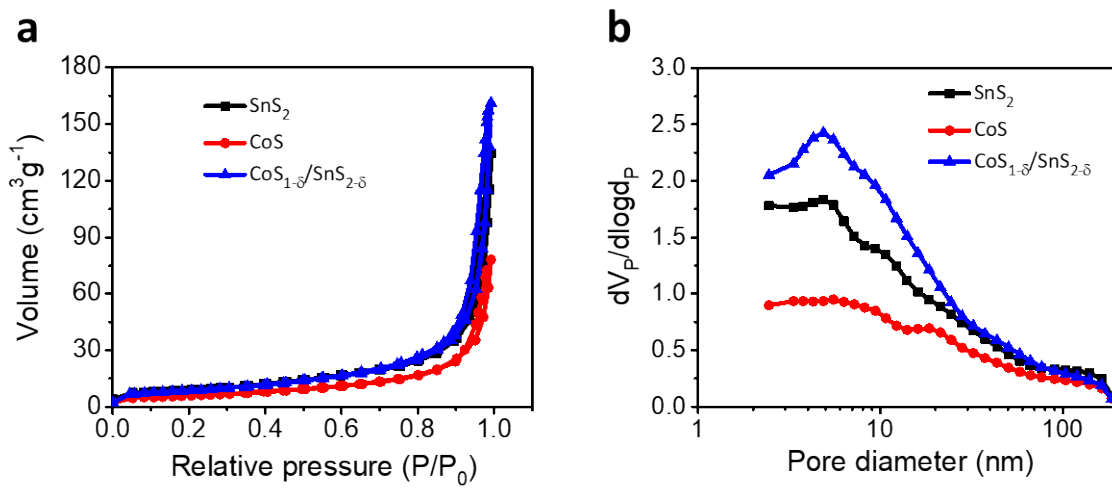

**Figure S4. BET characterization.** (a) Nitrogen sorptions and (b) pore distributions for SnS<sub>2</sub>, CoS, and CoS<sub>1-δ</sub>/SnS<sub>2-δ</sub> catalysts.



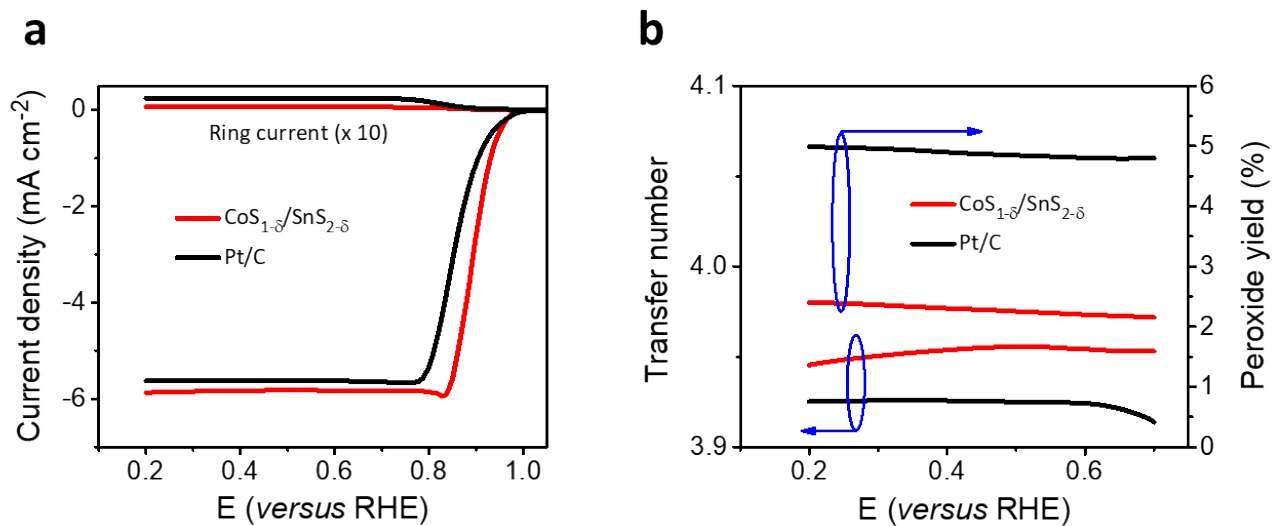

**Figure S5. Electrochemical performance.** (a) Disc and ring current LSV polarizations for  $\text{CoS}_{1.8}/\text{SnS}_{2.8}$  and reference Pt/C catalysts. (b) Electron transfer numbers and peroxide yield of  $\text{CoS}_{1.8}/\text{SnS}_{2.8}$  and reference Pt/C materials from 0.2 to 0.7 V.

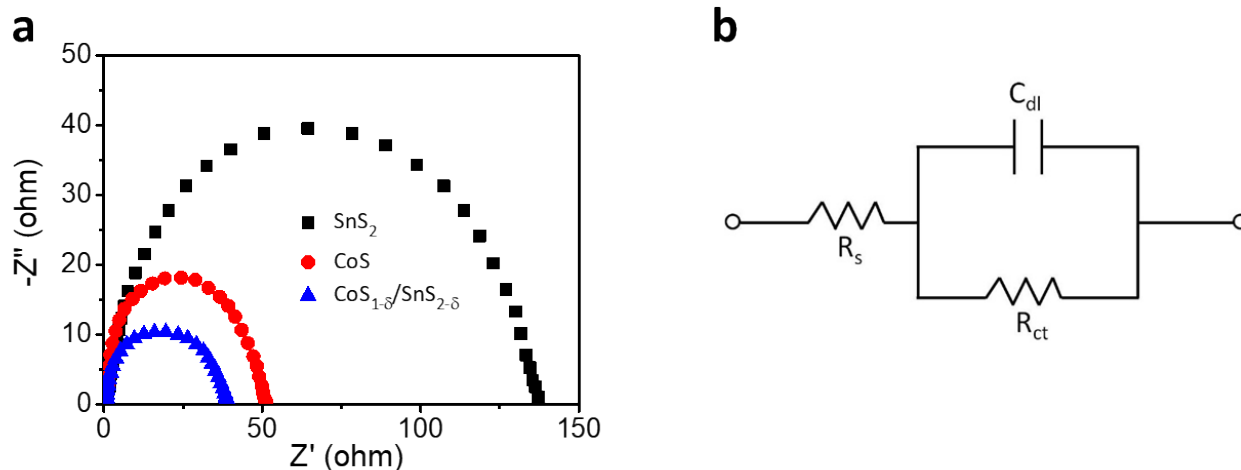

**Figure S6. ORR electrochemical kinetics.** (a) Electrochemical impedance spectra (EIS) for the  $\text{SnS}_2$ ,  $\text{CoS}$ , and  $\text{CoS}_{1-\delta}/\text{SnS}_{2-\delta}$  catalysts. (b) Equivalent circuit.

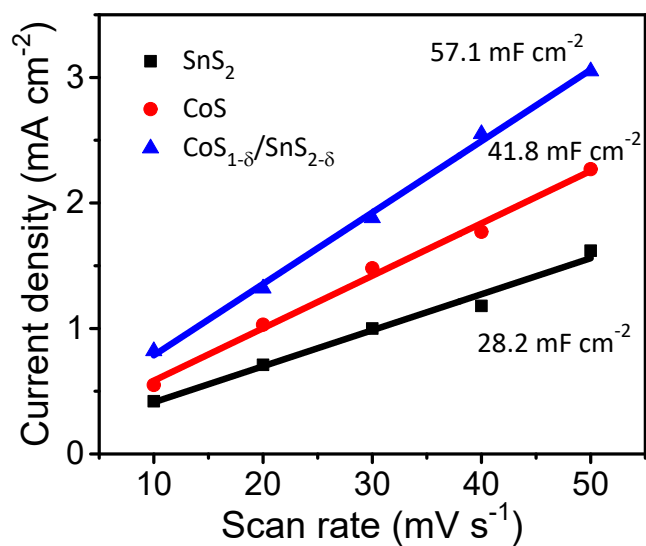

**Figure S7. Electrochemical kinetics.** Scan rate-dependent current density for  $\text{CoS}$ ,  $\text{SnS}_2$ , and  $\text{CoS}_{1-\delta}/\text{SnS}_{2-\delta}$  catalysts.

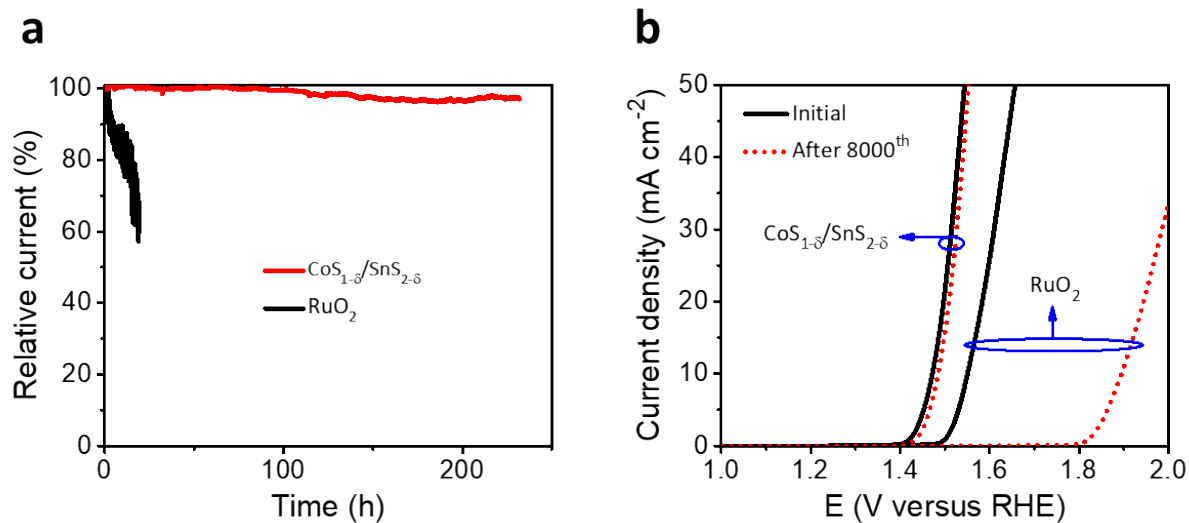

**Figure S8. Electrochemical OER stability tests.** (a) Comparison of i-t polarizations for  $\text{CoS}_{1.8}/\text{SnS}_{2.8}$  and  $\text{RuO}_2$  for their relevant overpotentials. (b) LSV polarizations for  $\text{CoS}_{1.8}/\text{SnS}_{2.8}$  and  $\text{RuO}_2$  catalysts for initial and after 8,000<sup>th</sup> cycles.

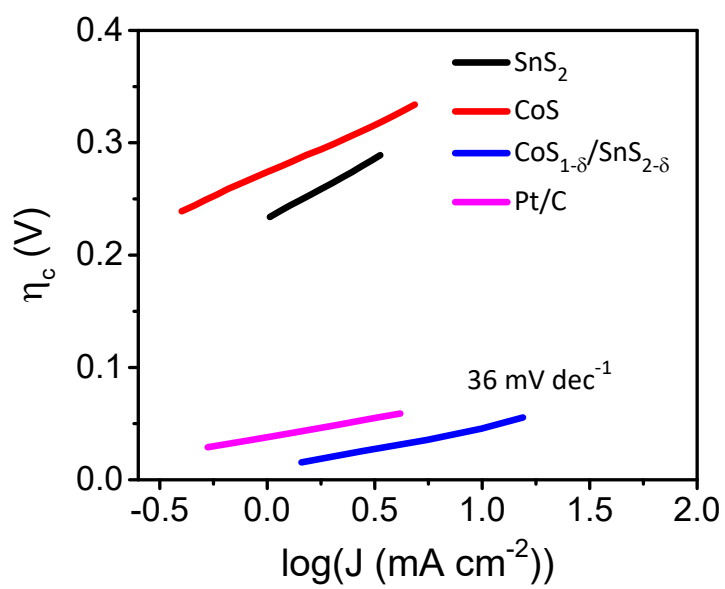

**Figure S9. Electrochemical activity.** Tafel slopes of different catalysts for HER reactions.

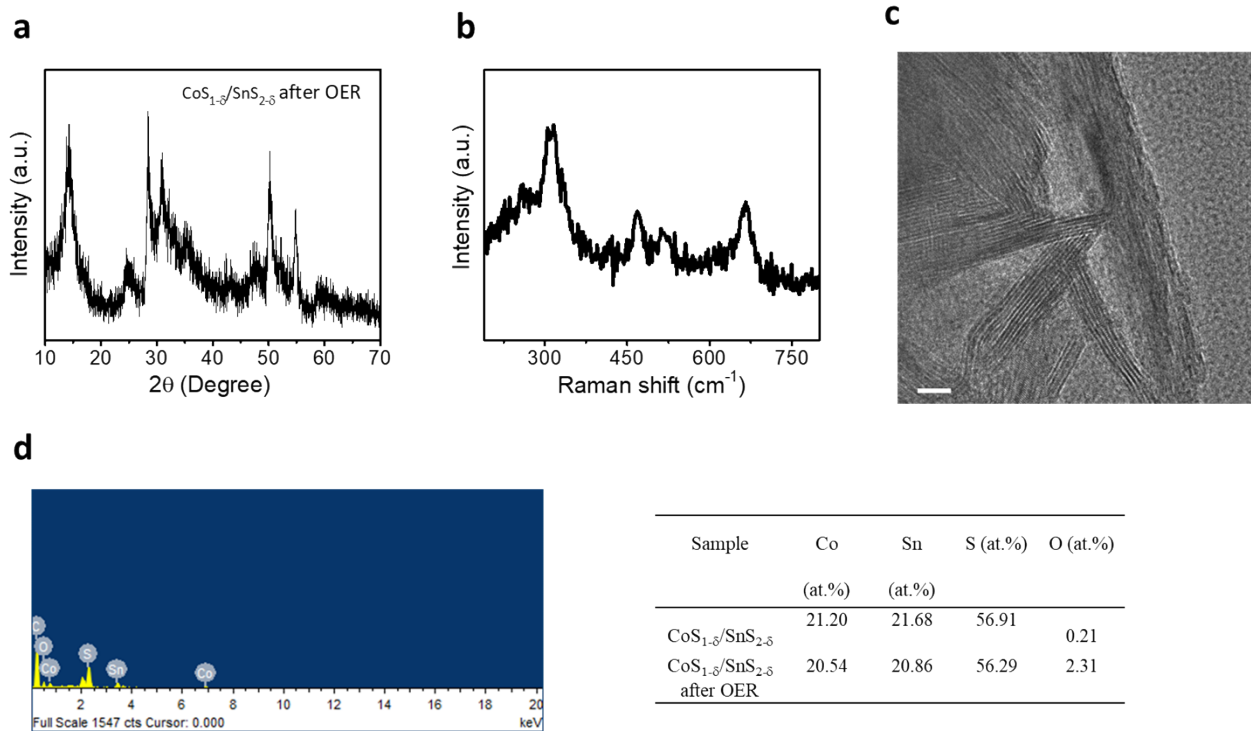

**Figure S10. Post-characterizations.** (a) XRD pattern, (b) Raman, spectra, (c) HRTEM image, and EDS contents of CoS<sub>1.8</sub>/SnS<sub>2.8</sub> after OER. Scale- 5 nm

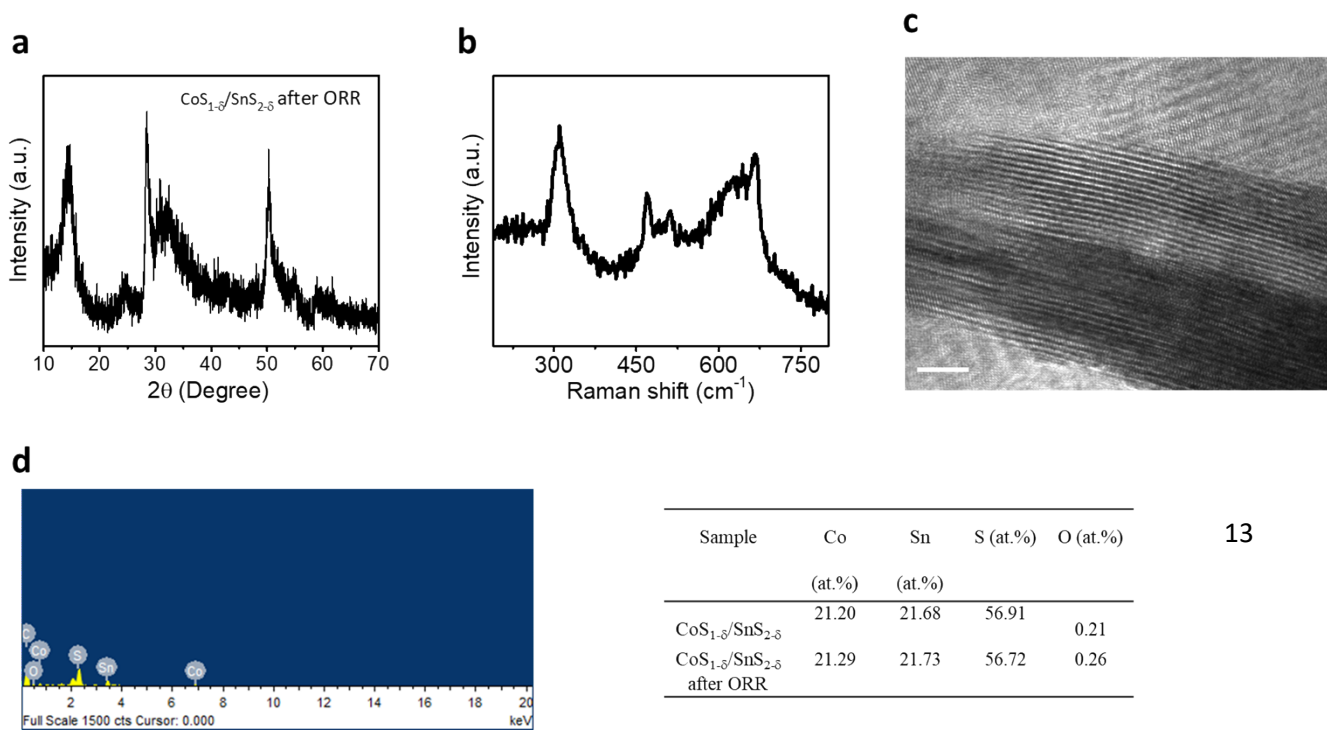

**Figure S11. Post-characterizations.** (a) XRD pattern, (b) Raman, spectra, (c) HRTEM image, and EDS contents of  $\text{CoS}_{1-\delta}/\text{SnS}_{2-\delta}$  after ORR. Scale- 5 nm

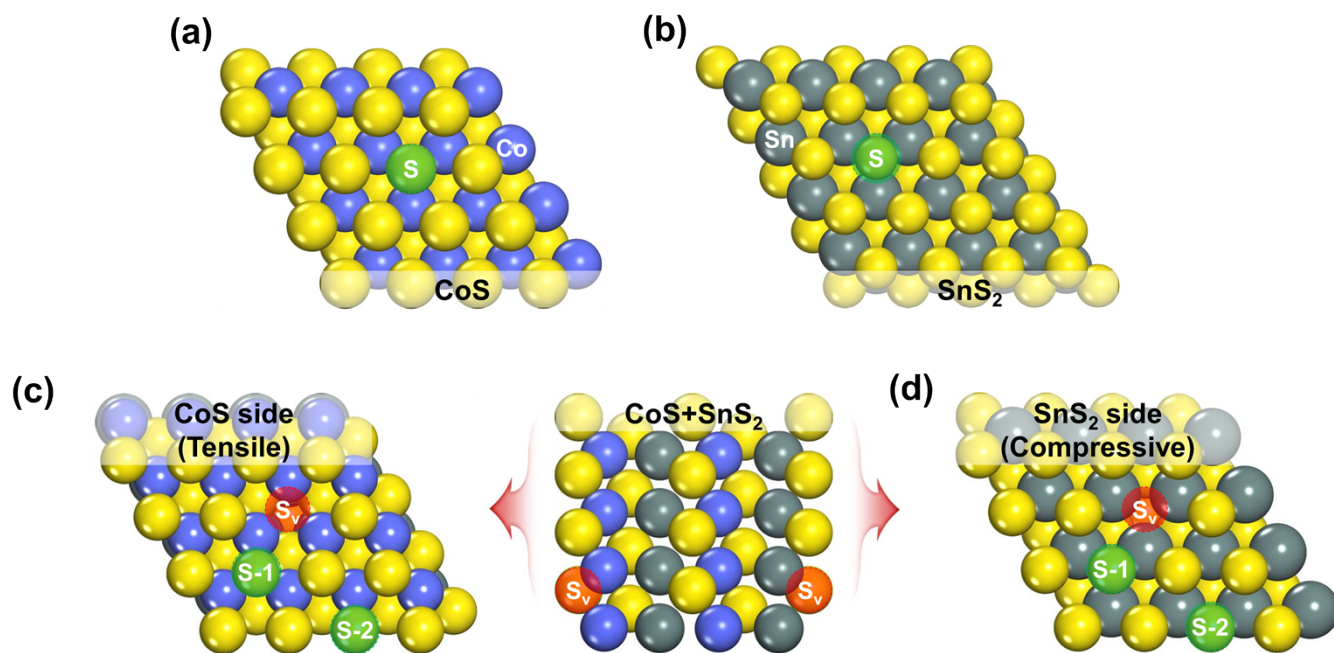

**Figure S12.** (a) CoS, (b) SnS<sub>2</sub>, (c) CoS<sub>1-δ</sub>/SnS<sub>2</sub>, and (d) CoS/SnS<sub>2-δ</sub> structures with all possible HER and OER/ORR active sites. Green and red circle indicates S and S defect site. S defect exposes Co and Sn sites.

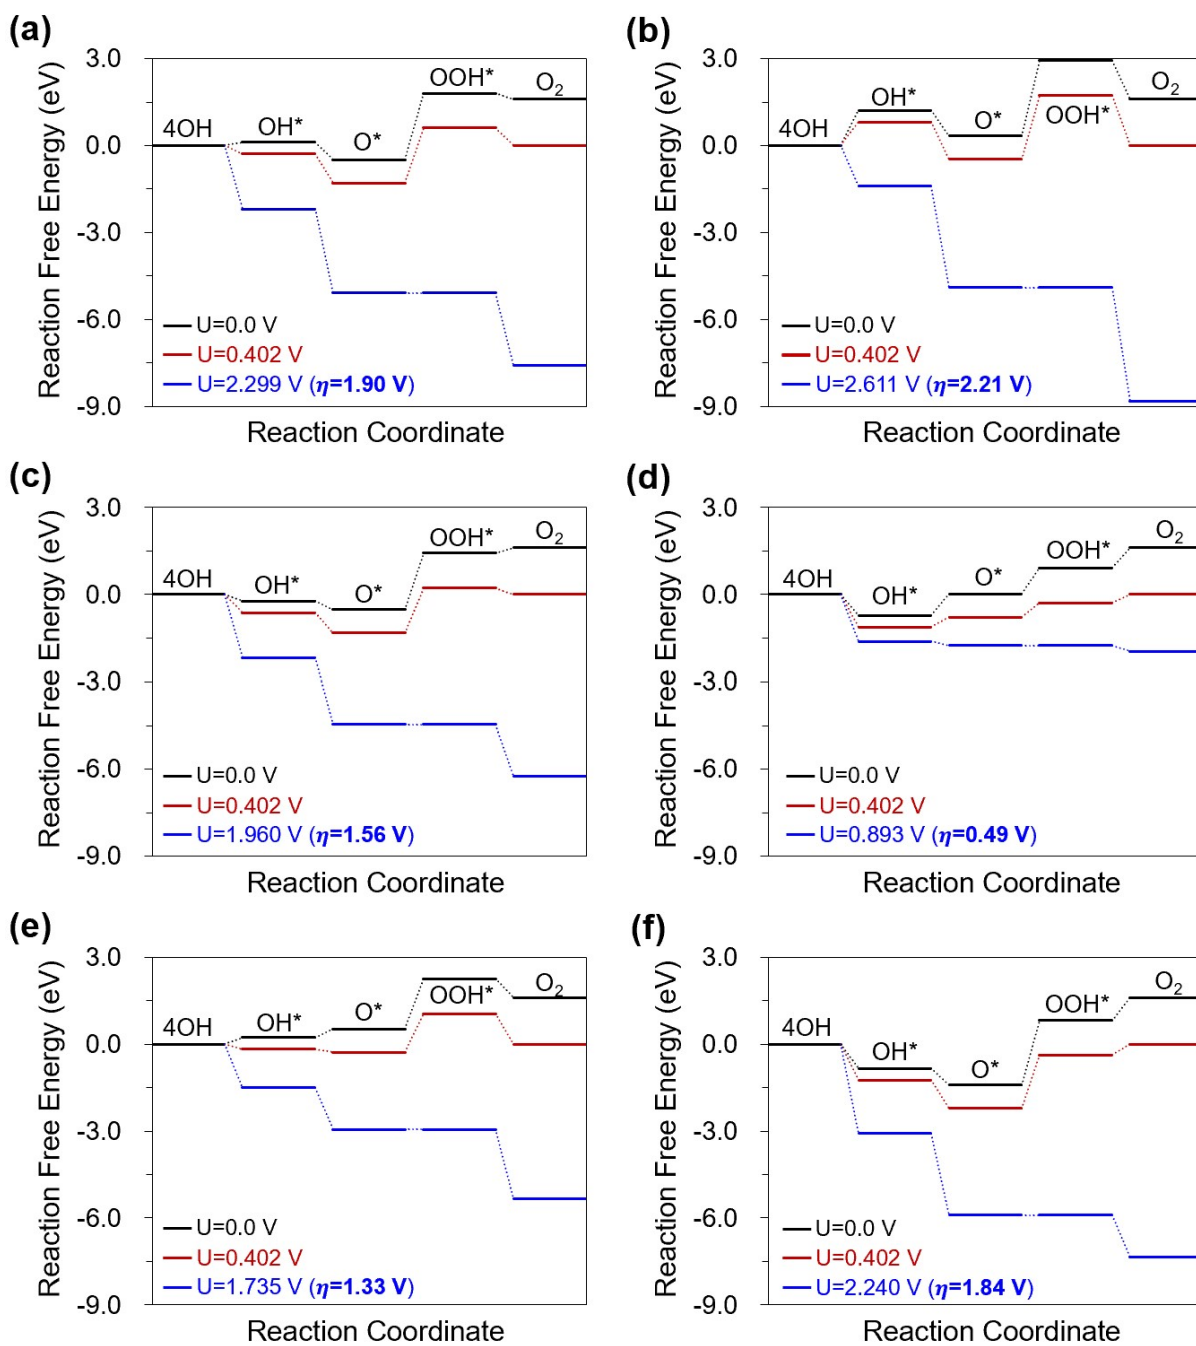

**Figure S13.** OER free energy diagrams (FEDs) for the (a) S site of CoS, (b) S site of SnS<sub>2</sub>, (c) S site of CoS<sub>1- $\delta$</sub> /SnS<sub>2</sub>, (d) S<sub>v</sub> (Sn site) of CoS<sub>1- $\delta$</sub> /SnS<sub>2</sub>, (e) S site of CoS/SnS<sub>2- $\delta$</sub> , and (f) S<sub>v</sub> (Sn site) of CoS/SnS<sub>2- $\delta$</sub> .



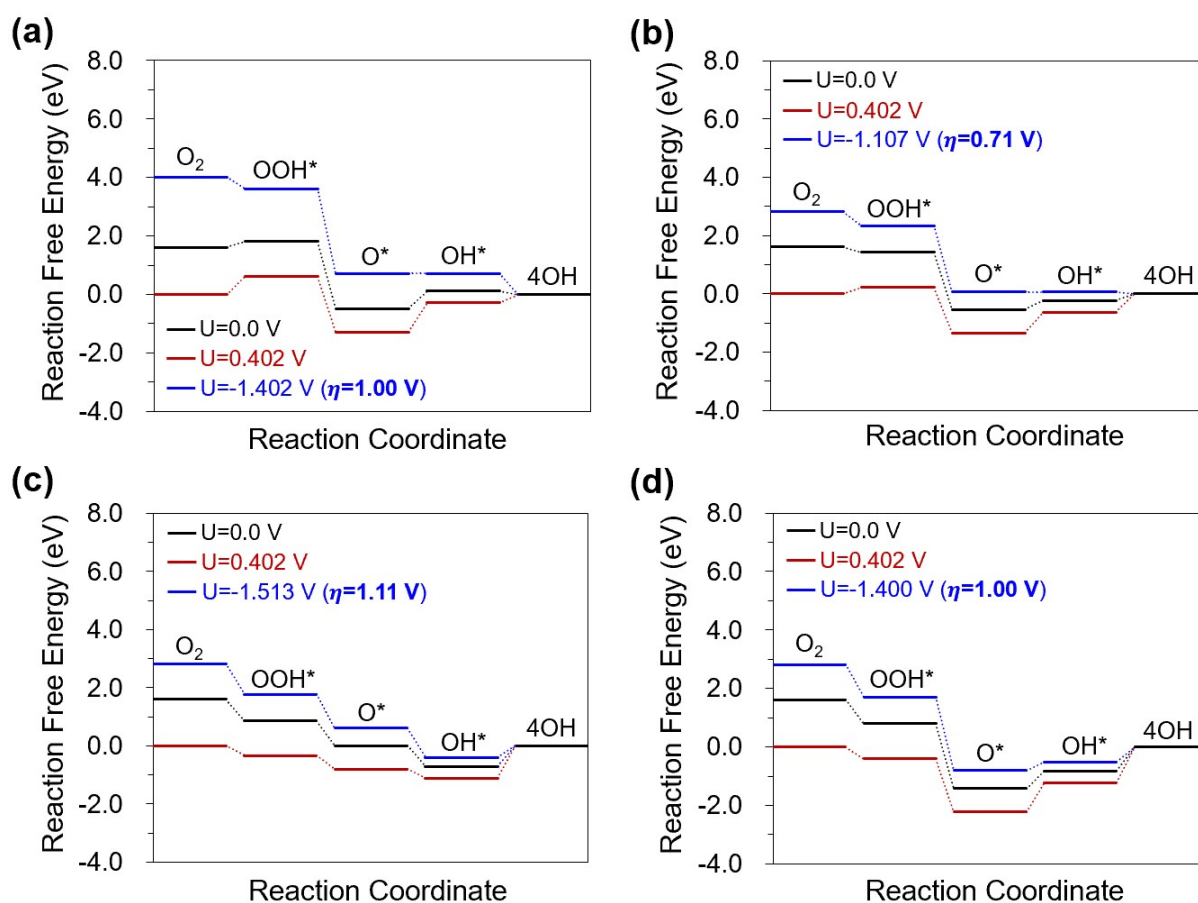

**Figure S14.** Four-step ORR free energy diagrams (FEDs) for the (a) S site of CoS, (b) S site of  $CoS_{1-\delta}/SnS_2$ , (c)  $S_v$  (Co site) of  $CoS_{1-\delta}/SnS_2$ , and (d)  $S_v$  (Sn site) of  $CoS/SnS_{2-\delta}$ . The  $O_2$  binding on S sites of  $CoS/SnS_{2-\delta}$  and  $SnS_2$  has physisorption leading to an inefficient ORR process, and thus, they are excluded.

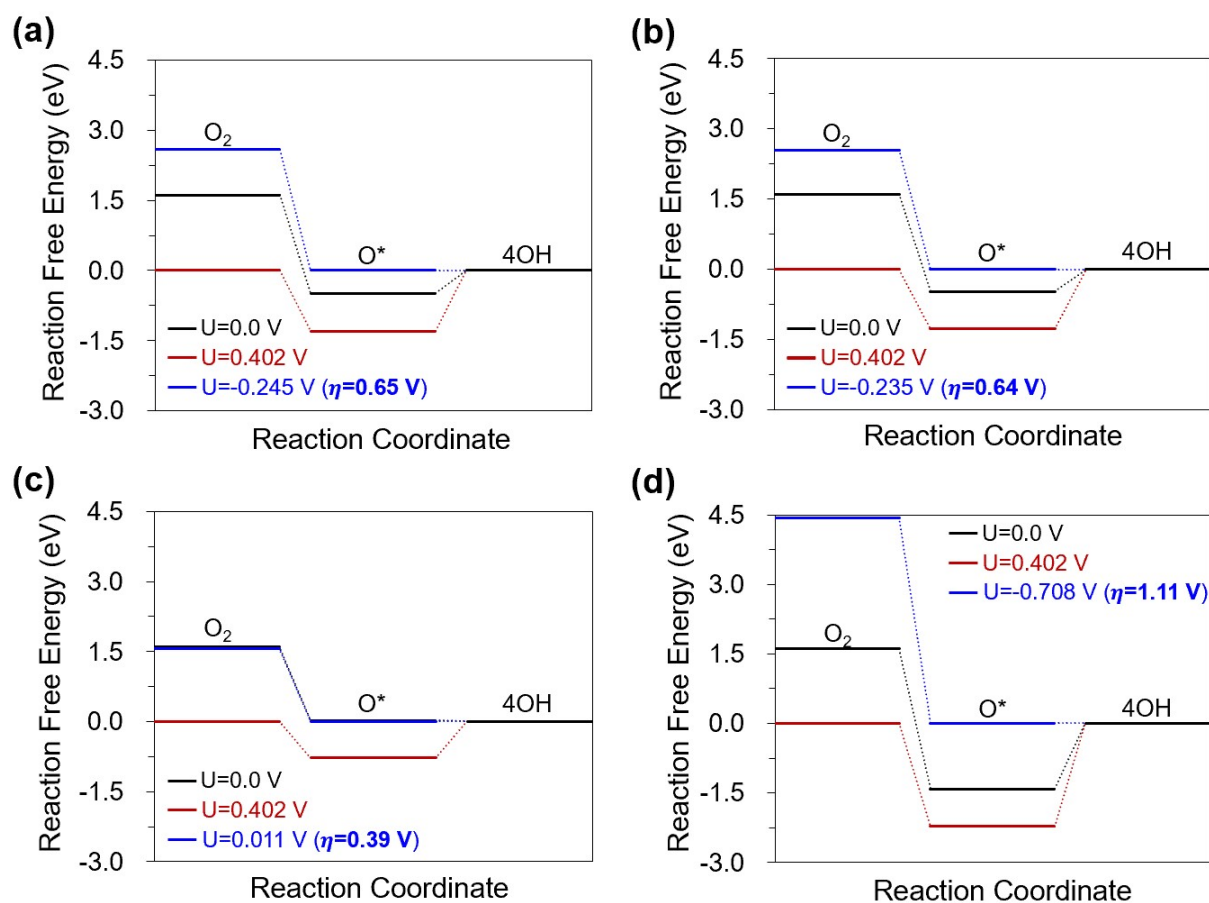

**Figure S15.** Two-step ORR free energy diagrams (FEDs) for the (a) S site of CoS, (b) S site of  $CoS_{1-\delta}/SnS_2$ , (c)  $S_v$  (Co site) of  $CoS_{1-\delta}/SnS_2$ , and (d)  $S_v$  (Sn site) of  $CoS/SnS_{2-\delta}$ . The  $O_2$  binding on S sites of  $CoS/SnS_{2-\delta}$  and  $SnS_2$  has physisorption leading to an inefficient ORR process, and thus, they are excluded.

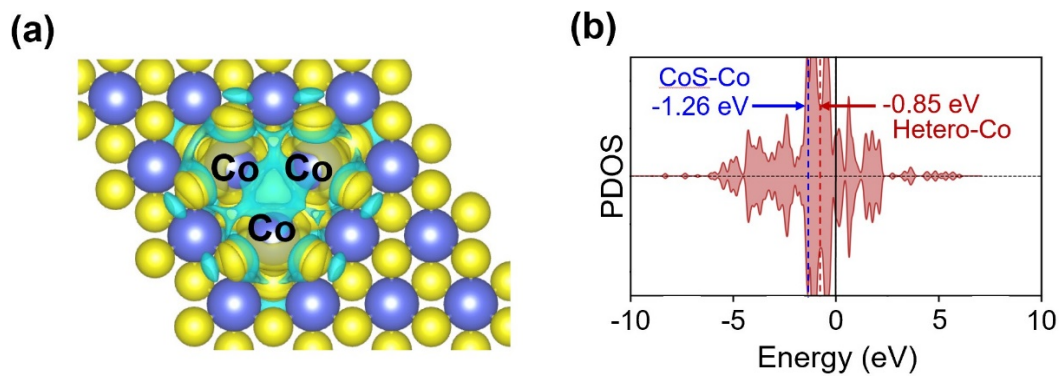

**Figure S16.** (a) Charge density difference of Co sites generated by S defect and the isosurface level is  $0.0015 \text{ e}\text{\AA}^{-3}$ . Cyan and yellow colors indicate hole and electron, respectively. (b) Partial Density of states (PDOS) for  $\text{Co}_{d\text{-orbitals}}$  of  $\text{CoS}_{1-\delta}/\text{SnS}_2$  structure. Red and blue dashed lines represent the  $d$ -band center for Co site of CoS and  $\text{CoS}_{1-\delta}/\text{SnS}_2$ , respectively.

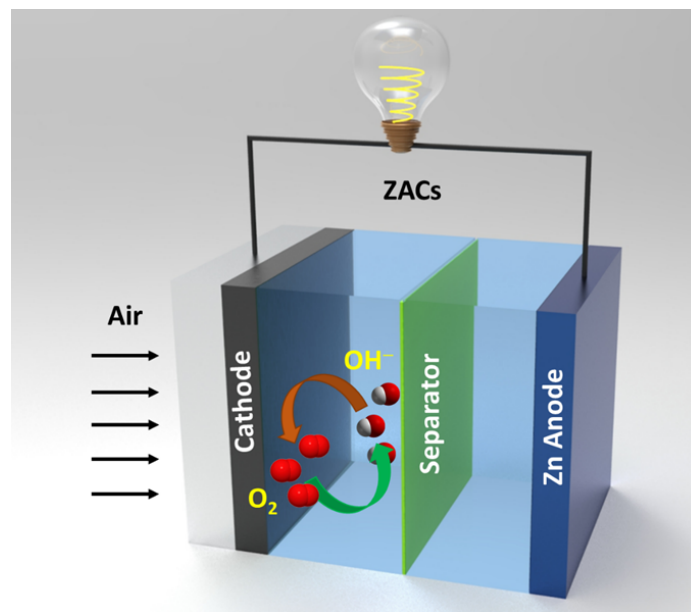

**Figure S17. Alkaline cell design.** Schematic illustration for alkaline secondary ZABs.

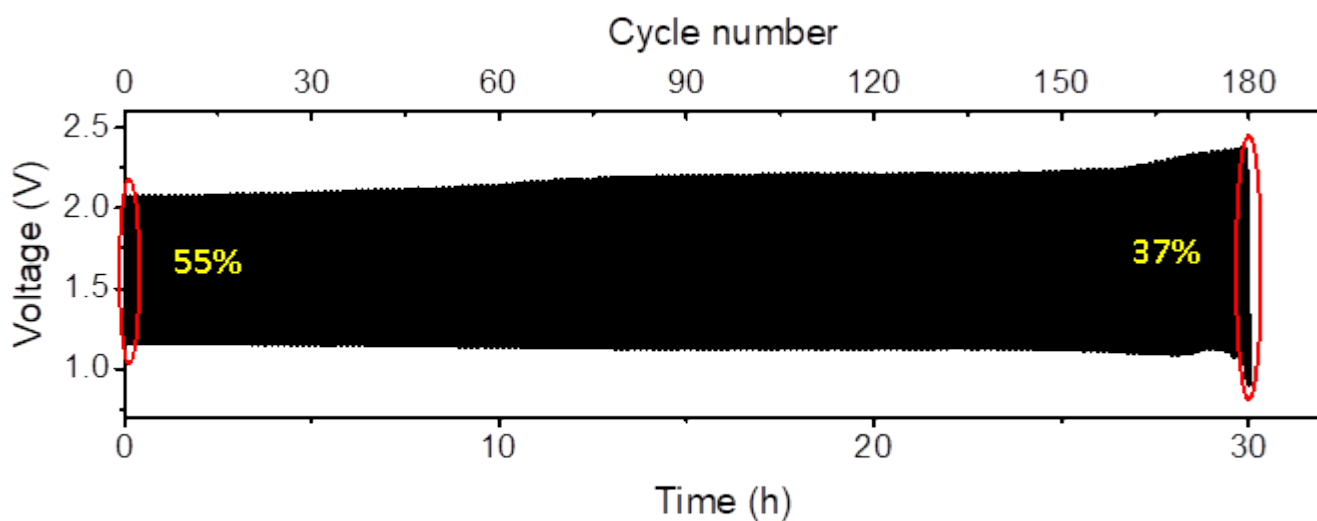

**Figure S18. Alkaline ZABs electrochemical performance.** Charge-discharge cycle operations for Pt/C + RuO<sub>2</sub> based aqueous ZABs. (Conditions: Current density = 20 mA cm<sup>-2</sup>, electrolyte = 6 M KOH + 0.2 M Zn acetate)

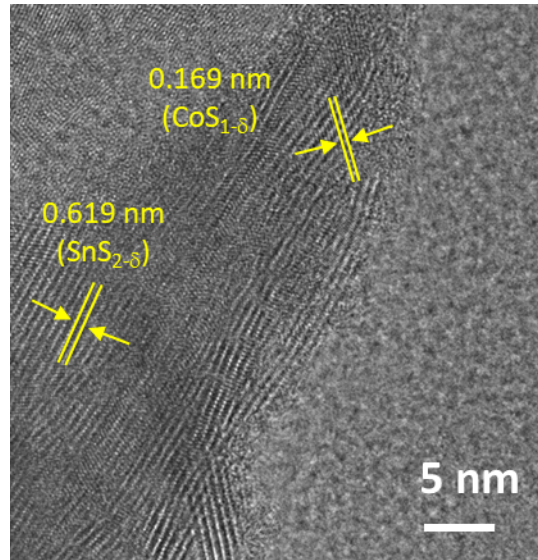

**Figure S19. Post microscopic characterizations.** HRTEM image of CoS<sub>1-δ</sub>/SnS<sub>2-δ</sub> cathode after 1008 discharge and charge cycles at 20 mA cm<sup>-2</sup> for alkaline ZABs.

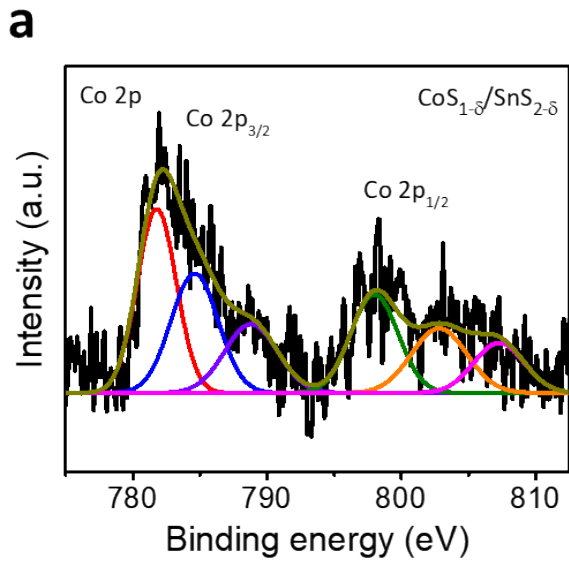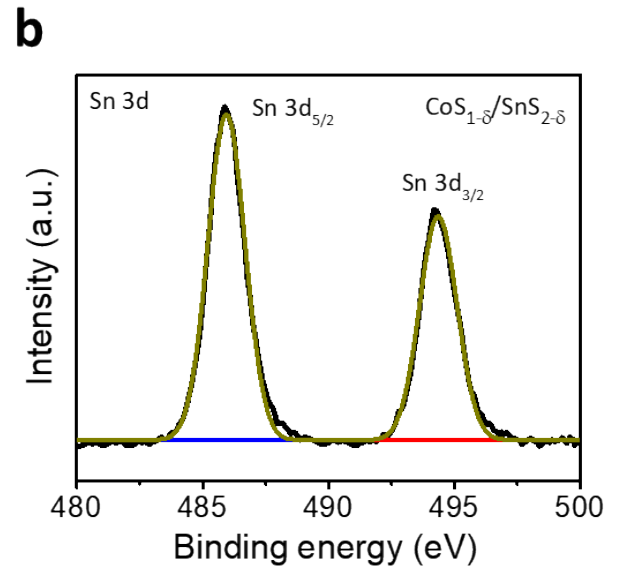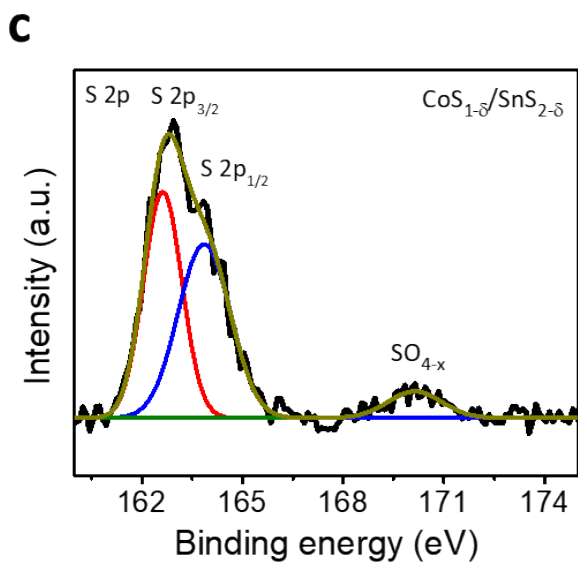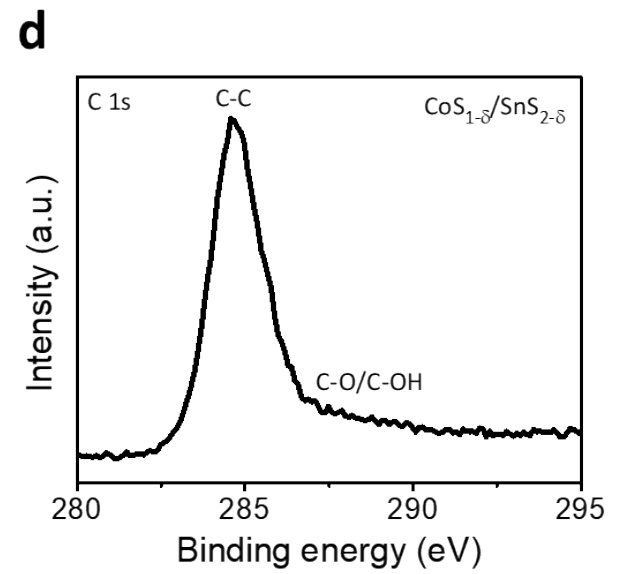

**Figure S20. Post spectroscopic characterizations.** XPS spectra for  $\text{CoS}_{1-\delta}/\text{SnS}_{2-\delta}$  cathode after 1008 discharge and charge cycles for alkaline ZABs at  $20 \text{ mA cm}^{-2}$ . (a) Co 2p, (b) Sn 3d, (c) S 2p, and (d) C 1s.



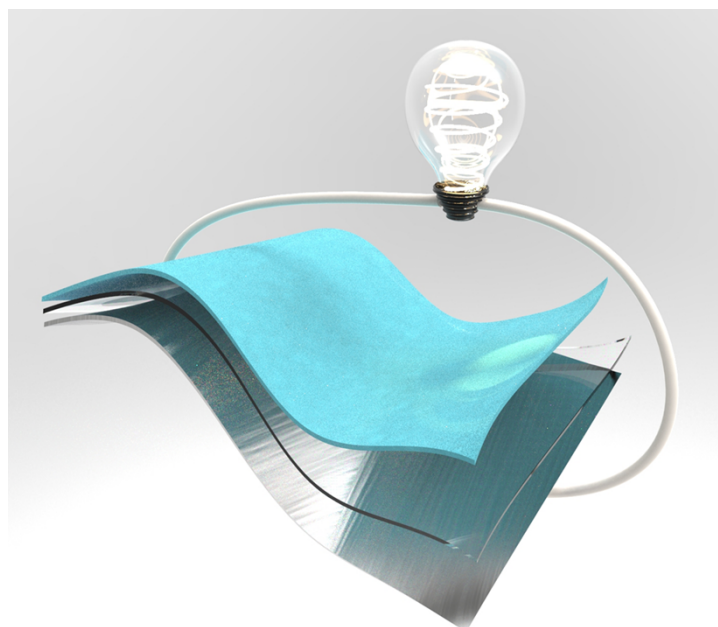

**Figure S21. Flexible ZABs assembly.** Design structure for flexible solid-state ZABs.

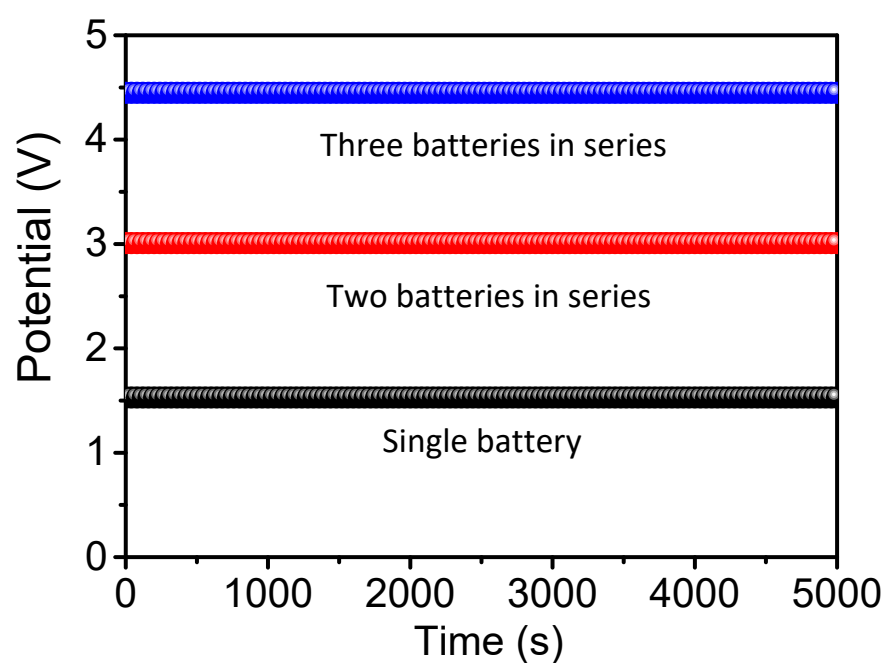

**Figure S22. Electrochemical performance.** Open circuit potentials (OCPs) for the designed  $\text{CoS}_{1-\delta}/\text{SnS}_{2-\delta}$  cathode based flexible ZABs for serial connections of one, two, and three cells.

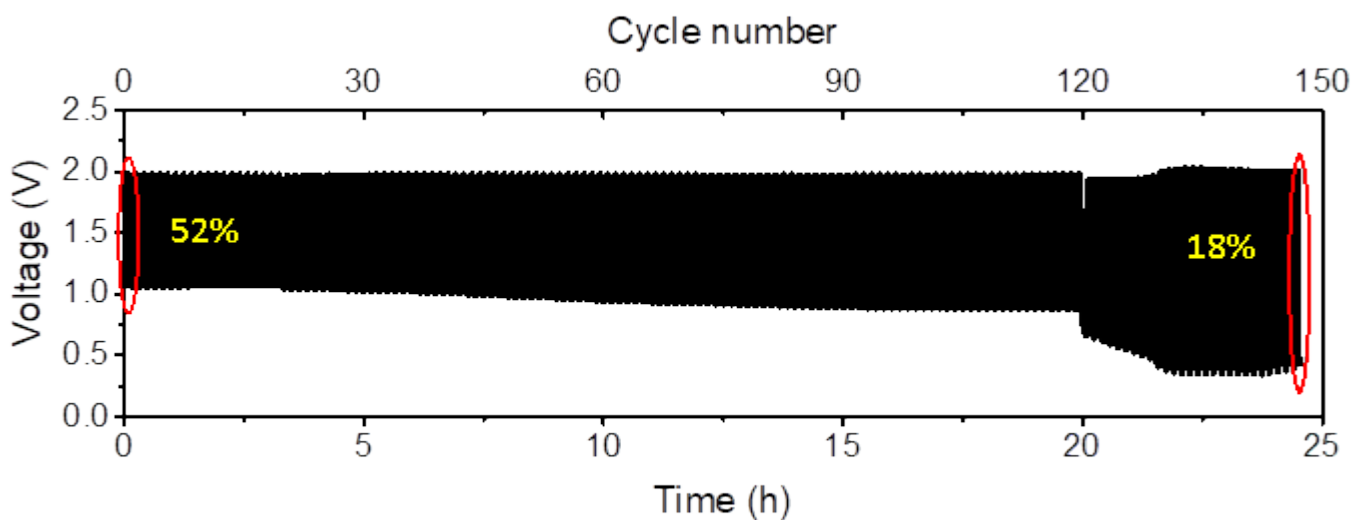

**Figure S23. Flexible ZABs electrochemical performance.** Galvanostatic cycle operations for Pt/C + RuO<sub>2</sub> based flexible Zn-air cells for the current rate of 50 mA cm<sup>-2</sup> (Time: 10 min per cycle).

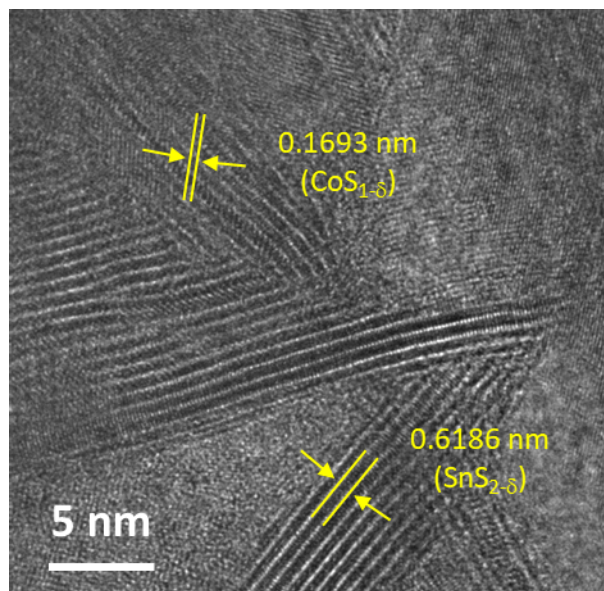

**Figure S24. Post microscopic characterizations.** HRTEM image of CoS<sub>1.8</sub>/SnS<sub>2.8</sub> cathode after 690 discharge–charge cycle operations for flexible ZABs at 50 mA cm<sup>-2</sup>.

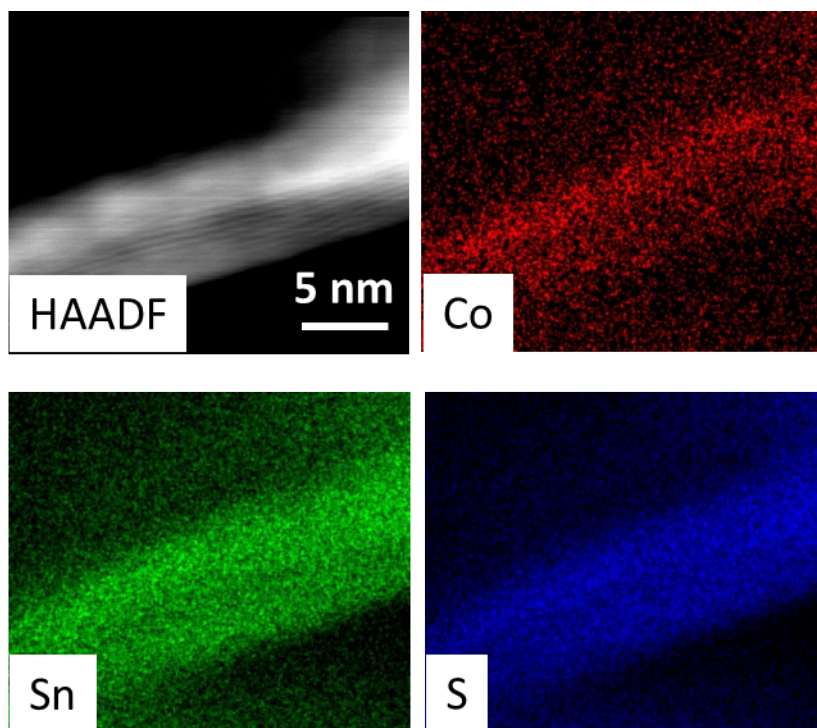

**Figure S25. Elemental characterizations.** HAADF image and elemental maps of  $\text{CoS}_{1.8}/\text{SnS}_{2.8}$  cathode after 690 discharge–charge cycle operations for flexible ZABs at  $50 \text{ mA cm}^{-2}$ .

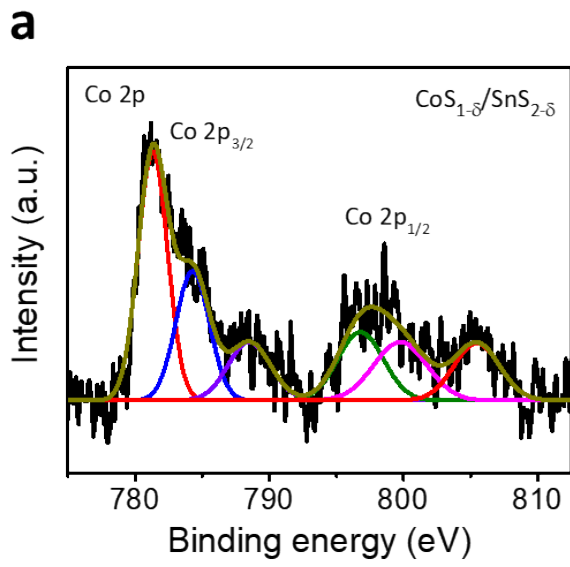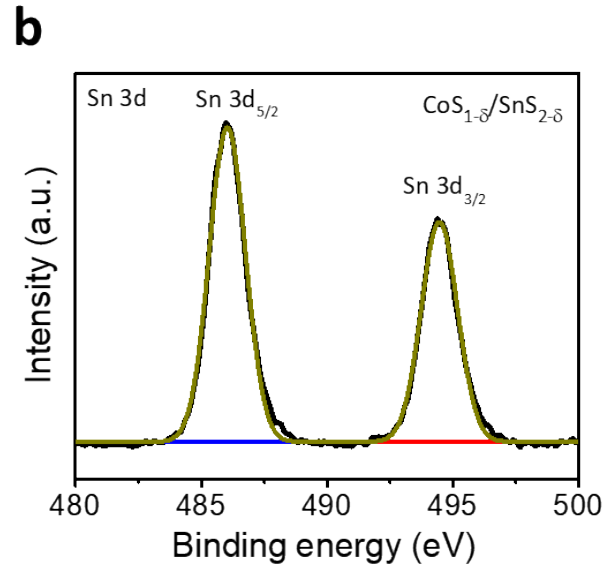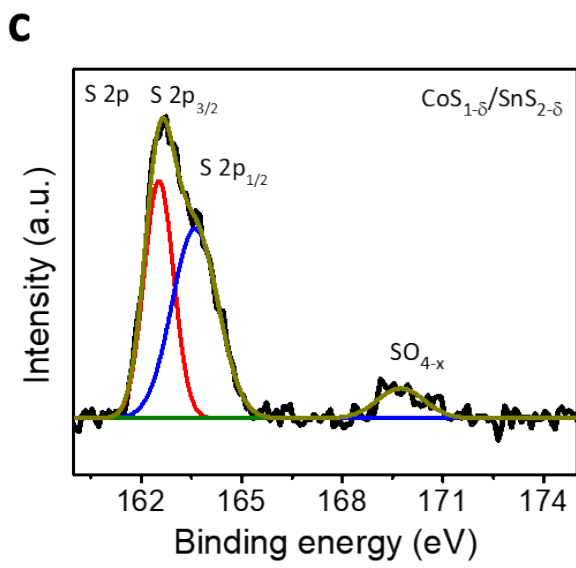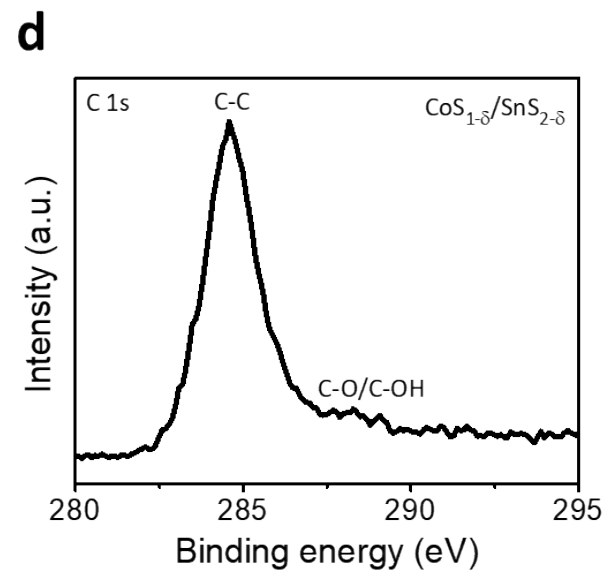

**Figure S26. Post spectroscopic characterizations.** XPS spectra for  $\text{CoS}_{1-\delta}/\text{SnS}_{2-\delta}$  cathode after 690 discharge-charge operations at  $50 \text{ mA cm}^{-2}$  for flexible ZABs. (a) Co 2p, (b) Sn 3d, (c) S 2p, and (d) C 1s.

## Supplementary Tables

**Table S1.** Quantitative elemental statistics for the prepared catalysts based on the SEM-EDS analysis.

| Sample                                 | Co<br>(at.%) | Sn<br>(at.%) | S (at.%) | S vacancies<br>(%) |
|----------------------------------------|--------------|--------------|----------|--------------------|
| SnS <sub>2</sub>                       | -            | 33.19        | 66.81    | -                  |
| CoS                                    | 49.89        | -            | 50.11    | -                  |
| CoS <sub>1-δ</sub> /SnS <sub>2-δ</sub> | 21.20        | 21.68        | 56.91    | 0.1545             |

**Table S2.** Composition estimation of Co, Sn, and S elements in the fabricated different catalysts based on the SEM-EDS analysis.

| Sample                                                                 | Co (at.%) | Sn (at.%) | S (at.%) | S vacancies<br>(ratio) |
|------------------------------------------------------------------------|-----------|-----------|----------|------------------------|
| Co <sub>0.2</sub> S <sub>1-δ</sub> /Sn <sub>1.8</sub> S <sub>2-δ</sub> | 4.91      | 38.83     | 56.16    | 0.192                  |
| Co <sub>0.6</sub> S <sub>1-δ</sub> /Sn <sub>1.4</sub> S <sub>2-δ</sub> | 14.44     | 28.45     | 57.01    | 0.1495                 |
| CoS <sub>1-δ</sub> /SnS <sub>2-δ</sub>                                 | 21.20     | 21.68     | 56.91    | 0.1545                 |
| Co <sub>1.4</sub> S <sub>1-δ</sub> /Sn <sub>0.6</sub> S <sub>2-δ</sub> | 29.40     | 14.00     | 56.43    | 0.1785                 |
| Co <sub>1.8</sub> S <sub>1-δ</sub> /Sn <sub>0.2</sub> S <sub>2-δ</sub> | 39.46     | 4.87      | 55.47    | 0.2265                 |

**Table S3.** Composition influence of Co and Sn ratio in the  $\text{CoS}_{1-\delta}/\text{SnS}_{2-\delta}$  based catalysts for overall oxygen bifunctional performances.

| Catalysts                                                               | Overall oxygen<br>bifunctional activity<br>$\Delta E$ (V) |
|-------------------------------------------------------------------------|-----------------------------------------------------------|
| $\text{Co}_{0.2}\text{S}_{1-\delta}/\text{Sn}_{1.8}\text{S}_{2-\delta}$ | 1.41                                                      |
| $\text{Co}_{0.6}\text{S}_{1-\delta}/\text{Sn}_{1.4}\text{S}_{2-\delta}$ | 0.97                                                      |
| $\text{CoS}_{1-\delta}/\text{SnS}_{2-\delta}$                           | 0.57                                                      |
| $\text{Co}_{1.4}\text{S}_{1-\delta}/\text{Sn}_{0.6}\text{S}_{2-\delta}$ | 0.79                                                      |
| $\text{Co}_{1.8}\text{S}_{1-\delta}/\text{Sn}_{0.2}\text{S}_{2-\delta}$ | 1.03                                                      |



**Table S4.** Comparison for bifunctional ORR and OER performance for the fabricated CoS<sub>1.8</sub>/SnS<sub>2.8</sub> and reported champion catalysts.

| Catalyst                                       | Loading<br>(mg cm <sup>-2</sup> ) | ORR<br>onset<br>potential<br>(V vs.<br>RHE) | ORR<br>Tafel<br>slope<br>(mV<br>dec <sup>-1</sup> ) | ORR<br>half-wave<br>potential<br>(E <sub>1/2</sub> )<br>(V vs. RHE) | OER<br>onset<br>potential<br>(V vs.<br>RHE) | OER Tafel<br>slope<br>(mV dec <sup>-1</sup> ) | OER<br>potential @<br>10 mA cm <sup>-2</sup><br>(E <sub>j=10</sub> )<br>(V vs. RHE) | Overall oxygen<br>electrode activity<br>$\Delta E$<br>(E <sub>j=10</sub> - E <sub>1/2</sub> )<br>(V) | References |
|------------------------------------------------|-----------------------------------|---------------------------------------------|-----------------------------------------------------|---------------------------------------------------------------------|---------------------------------------------|-----------------------------------------------|-------------------------------------------------------------------------------------|------------------------------------------------------------------------------------------------------|------------|
| CoS <sub>1.8</sub> /SnS <sub>2.8</sub>         | 0.10                              | -                                           | 46                                                  | 0.90                                                                | -                                           | 55                                            | 1.47                                                                                | 0.57                                                                                                 | This work  |
| PEMAC@NDCN                                     | 0.15                              | -                                           | 42                                                  | 0.87                                                                | -                                           | 48                                            | 1.48                                                                                | 0.61                                                                                                 | S5         |
| Mn/Fe-HIB-MOF                                  | 0.15                              | 0.98                                        | 36                                                  | 0.883                                                               | 1.33                                        | 45                                            | 1.51                                                                                | 0.63                                                                                                 | S6         |
| Fe/SNCFs-NH <sub>3</sub>                       | -                                 | -                                           | 70.82                                               | 0.89                                                                | -                                           | -                                             | 1.78                                                                                | 0.89                                                                                                 | S7         |
| CPS(101)                                       | 0.1                               | 0.99                                        | 39                                                  | 0.90                                                                | 1.38                                        | 58                                            | 1.49                                                                                | 0.59                                                                                                 | S8         |
| FeCo SAs@Co/N-GC                               | 0.25                              | 0.98                                        | 49                                                  | 0.88                                                                | 1.44                                        | 56.6                                          | 1.52                                                                                | 0.64                                                                                                 | S9         |
| Ir@Co <sub>3</sub> O <sub>4</sub> <sup>a</sup> | 0.5                               | -                                           | -                                                   | 0.75                                                                | -                                           | -                                             | 1.51                                                                                | 0.76                                                                                                 | S10        |
| Ni SAs-NC <sup>a</sup>                         | 0.1                               | -                                           | -                                                   | 0.85                                                                | -                                           | 62                                            | 1.67                                                                                | 0.82                                                                                                 | S11        |
| Co-FPOH <sup>a</sup>                           | 0.283                             | 0.82                                        | 183                                                 | 0.69                                                                | -                                           | 63                                            | 1.52                                                                                | 0.83                                                                                                 | S12        |
| Co@IC/MoC@PC                                   | 0.4                               | -                                           | 78                                                  | 0.875                                                               | -                                           | 82                                            | 1.51                                                                                | 0.635                                                                                                | S13        |
| Nitride/N-Ti <sub>3</sub> C <sub>2</sub>       | 1.0                               | 0.95                                        | -                                                   | 0.84                                                                | 1.48                                        | 72                                            | 1.53                                                                                | 0.69                                                                                                 | S14        |
| IOSHs-NSC-Co <sub>9</sub> S <sub>8</sub>       | 1                                 | -                                           | -                                                   | 0.82                                                                | -                                           | 101                                           | 1.64                                                                                | 0.82                                                                                                 | S15        |
| NPMC-1000                                      | 0.10                              | 0.94                                        | -                                                   | 0.85                                                                | 1.30                                        | -                                             | -                                                                                   | -                                                                                                    | S16        |
| NiO/CoN PINWs                                  | 0.20                              | 0.89                                        | 35                                                  | 0.68                                                                | 1.53                                        | -                                             | 1.53                                                                                | 0.85                                                                                                 | S17        |

|                                         |      |       |      |       |      |      |       |       |     |
|-----------------------------------------|------|-------|------|-------|------|------|-------|-------|-----|
| PS-CNS                                  | 0.15 | 0.97  | 61   | 0.87  | 1.26 | 64   | 1.56  | 0.69  | S18 |
| Co <sub>4</sub> N/CNW/CC                | 0.20 | 0.89  | -    | 0.80  | 1.50 | 81   | 1.54  | 0.74  | S19 |
| CCO@C                                   | 0.2  | 0.95  | -    | 0.86  | 1.47 | 74   | 1.56  | 0.70  | S20 |
| 1100-CNS                                | 0.42 | 0.99  | 58   | 0.88  | 1.50 | 292  | 1.69  | 0.81  | S21 |
| C-MOF-C2-900                            | 0.5  | 0.92  | -    | 0.817 | 1.50 | 79   | 1.58  | 0.763 | S22 |
| Co-N,B-CSs                              | 0.1  | 0.89  | 64   | 0.83  | 1.42 | -    | 1.66  | 0.83  | S23 |
| S-C <sub>2</sub> NA                     | 0.15 | 0.98  | 54   | 0.88  | 1.28 | 62   | 1.53  | 0.65  | S24 |
| FeN <sub>x</sub> -PNC                   | 0.14 | 0.99  | -    | 0.86  | 1.56 | 80   | 1.63  | 0.77  | S25 |
| CFZr(0.3)/N-rGO                         | 0.3  | 0.85  | -    | 0.76  | 1.4  | -    | 1.6   | 0.84  | S26 |
| NDGs-800                                | 0.2  | 0.98  | 81   | 0.85  | 1.5  | 132  | 1.68  | 0.83  | S27 |
| CMO/S-300                               | 0.3  | 0.915 | 52   | 0.76  | 1.5  | -    | 1.70  | 0.94  | S28 |
| Co/Co <sub>3</sub> O <sub>4</sub> @PGS  | 0.3  | 0.97  | 52.6 | 0.89  | 1.52 | 76.1 | 1.58  | 0.69  | S29 |
| DN-CP@G                                 | 0.2  | 0.95  | -    | 0.801 | 1.5  | 65   | 1.788 | 0.987 | S30 |
| N-GRW                                   | 0.30 | 0.92  | 53   | 0.84  | 1.53 | 47   | 1.59  | 0.75  | S31 |
| NCNF-1000                               | 0.10 | 0.94  |      | 0.85  | 1.30 |      | 1.84  | 1.02  | S32 |
| NiCo <sub>2</sub> S <sub>4</sub> /N-CNT | 0.25 | 0.93  | -    | 0.80  | -    | -    | 1.60  | 0.80  | S33 |
| NC-Co <sub>3</sub> O <sub>4</sub> -90   | 1.2  | 0.91  | -    | 0.87  | -    | -    | 1.59  | 0.72  | S34 |
| FeNi@N-GR                               | 0.2  | 0.94  | -    | 0.83  | 1.38 | 62   | 1.44  | 0.61  | S35 |
| PS-CNF                                  | 0.2  | 0.95  | 29   | 0.86  | 1.32 | 89   | 1.55  | 0.69  | S36 |

|                                      |      |      |       |      |      |      |      |      |     |
|--------------------------------------|------|------|-------|------|------|------|------|------|-----|
| S <sub>3</sub> N-Fe/N/C-CNT          | 0.25 | 0.94 | -     | 0.84 | 1.45 | 82   | 1.60 | 0.76 | S37 |
| Co <sub>3</sub> O <sub>4</sub> /NPGC | 0.20 | 0.97 | -     | 0.84 | 1.45 | -    | 1.68 | 0.84 | S38 |
| PCN-CFP                              | 0.20 | 0.94 | 122.3 | 0.67 | 1.53 | 61.6 | 1.63 | 0.96 | S39 |
| N-GCNT/FeCo-3                        | 0.40 | 1.03 | 66.8  | 0.92 | 1.42 | 99.5 | 1.73 | 0.81 | S40 |
| CoO/N-G                              | 0.70 | 0.90 | 48    | 0.81 | 1.30 | 71   | 1.57 | 0.76 | S41 |

---

**Table S5.** Comparison for HER activities for the fabricated CoS<sub>1-8</sub>/SnS<sub>2-8</sub> and reported champion catalysts. (Electrolyte conditions- a. 0.1 M KOH, b. 1 M KOH)

| Catalyst                                                        | Loading<br>(mg cm <sup>-2</sup> ) | Onset<br>potential<br>(V vs. RHE) | Current<br>density<br>(mA cm <sup>-2</sup> ) | Overpotential<br>at j<br>(mV) | HER Tafel<br>slope<br>(mV dec <sup>-1</sup> ) | References |
|-----------------------------------------------------------------|-----------------------------------|-----------------------------------|----------------------------------------------|-------------------------------|-----------------------------------------------|------------|
| CoS <sub>1-8</sub> /SnS <sub>2-8</sub> <sup>a</sup>             | 0.2                               | -                                 | 10                                           | 41                            | 36                                            | This work  |
| CPS (101) <sup>a</sup>                                          | 0.2                               | -0.015                            | 10                                           | 39                            | 26                                            | S8         |
| NOGB-800 <sup>b</sup>                                           | 0.4                               | -                                 | 10                                           | 220                           | 98                                            | S42        |
| GHBGQD2 <sup>a</sup>                                            | -                                 | -0.08                             | 10                                           | 130                           | 95                                            | S43        |
| Co/CNF (1000) <sup>b</sup>                                      | 0.3                               |                                   | 10                                           | 190                           | 66                                            | S44        |
| Co-Co <sub>9</sub> S <sub>8</sub> @SN-<br>CNTs-900 <sup>a</sup> | 0.4                               | -0.12                             | 10                                           | 230                           | 92                                            | S45        |
| Ru@C <sub>2</sub> N <sup>a</sup>                                | 0.285                             |                                   | 10<br>15<br>20                               | 17<br>27<br>35.5              | 38                                            | S46        |
| CoMoS <sub>x</sub> <sup>a</sup>                                 | 0.050                             | -                                 | 5                                            | ~158                          | -                                             | S47        |
| np-CuTi <sup>a</sup>                                            | -                                 | -                                 | 10                                           | ~47                           | 110                                           | S48        |
| NF/NiMoO-H <sub>2</sub> <sup>b</sup>                            | 4.5                               | -                                 | 10<br>100                                    | 11<br>53                      | 43                                            | S49        |
| MoS <sub>x</sub> @NiO <sup>b</sup>                              | -                                 | -                                 | 10                                           | 406                           | 43                                            | S50        |
| CoP NWs 40s/CC <sup>b</sup>                                     | -                                 | -                                 | 100                                          | 150                           | 43                                            | S51        |
| NPNNS <sup>b</sup>                                              | 0.2                               | -                                 | 10                                           | 87                            | 69                                            | S52        |
| CoSe <sub>1.26</sub> P <sub>1.42</sub> <sup>b</sup>             | 0.3                               | -                                 | 100                                          | ~200                          | 90                                            | S53        |
| Mo <sub>2</sub> C nanobelts <sup>b</sup>                        | 0.5                               | -                                 | 10                                           | 110                           | 49.7                                          | S54        |
| Ru-RuO <sub>2</sub> /CNT <sup>b</sup>                           | 0.3                               | -0.012                            | 10                                           | 23                            | 30                                            | S55        |
| FeCoNiS <sub>x</sub>                                            | -                                 | -                                 | 10                                           | 174                           | -                                             | S56        |

|                     |   |   |    |    |      |     |
|---------------------|---|---|----|----|------|-----|
| CoN <sub>4</sub> -C | - | - | 10 | 94 | 55.4 | S57 |
|---------------------|---|---|----|----|------|-----|

---

**Table S6.**  $\Delta G_1$  free energies by the ORR four-step (associative) and two-step (Langmuir-Hinshelwood, LH) pathways, which are related to the relative stabilities of the OOH\* and O\* intermediates generated after the adsorption of O<sub>2</sub>, respectively.

| Structures                                             | Active sites             | $\Delta G_1$ (Associative) | $\Delta G_1$ (LH) |
|--------------------------------------------------------|--------------------------|----------------------------|-------------------|
| CoS                                                    | S                        | 0.20                       | -2.10             |
|                                                        | S-1                      | -0.04                      | -2.08             |
| CoS <sub>1-<math>\delta</math></sub> /SnS <sub>2</sub> | S-2                      | -0.18                      | -2.14             |
|                                                        | S <sub>v</sub> (Co site) | -0.74                      | -1.59             |
| CoS/SnS <sub>2-<math>\delta</math></sub>               | S <sub>v</sub> (Sn site) | -0.81                      | -3.02             |

**Table S7.** Comparison of CoS<sub>1-δ</sub>/SnS<sub>2-δ</sub> based ZABs performance in the alkaline electrolytes compared to those of previously reported champion materials.

| Catalyst                                 | OCP (V) | Power density<br>(mW cm <sup>-2</sup> ) | Specific capacity<br>(mAh g <sup>-1</sup> ) | Energy density<br>(Wh kg <sup>-1</sup> ) | Durability<br>(h) | References |
|------------------------------------------|---------|-----------------------------------------|---------------------------------------------|------------------------------------------|-------------------|------------|
| CoS <sub>1-δ</sub> /SnS <sub>2-δ</sub>   | 1.53    | 249                                     | 814                                         | 1066                                     | -                 | This work  |
| PEMAC@NDCN                               | 1.51    | 214                                     | 817                                         | 1070                                     | -                 | S5         |
| Pt/C +RuO <sub>2</sub>                   | 1.5     | 178                                     | 773                                         | 966                                      | -                 | S5         |
| Mn/Fe-HIB-MOFs                           | 1.50    | 195                                     | 768                                         | 1027                                     | -                 | S6         |
| Fe/SNCFs-NH <sub>3</sub>                 | -       | 255                                     | -                                           | -                                        | -                 | S7         |
| FeCo SAs@Co/N-GC                         | -       | 207                                     | 741                                         | 934                                      | -                 | S9         |
| Co-FPOH                                  | -       | 167.8                                   | 817                                         | 980                                      | -                 | S12        |
| Co@IC/MoC@PC                             | -       | 221                                     | 728                                         | -                                        | -                 | S13        |
| Nitride/N-Ti <sub>3</sub> C <sub>2</sub> | -       | 27                                      | 630                                         | 756                                      | -                 | S14        |
| PFN PF                                   | -       | 175                                     | 816                                         | 938                                      | -                 | S58        |
| Co <sub>9</sub> S <sub>8</sub> @N,S-C    | -       | 259                                     | 862                                         | -                                        | -                 | S59        |
| FeCo/Se-CNT                              | -       | 175                                     | 750                                         | 894                                      | -                 | S60        |
| Co-TMPyP/CCG                             | -       | 225                                     | 793                                         | -                                        | -                 | S61        |
| NPMC-1000                                | 1.48    | 55                                      | 735                                         | -                                        | 240 (~1.3 V)      | S16        |
| NiO/CoN PINWs                            | 1.46    | 79.6                                    | 690                                         | 945                                      | -                 | S17        |
| P,S-CNS                                  | 1.51    | 198                                     | 830                                         | -                                        | 210 (~1.3 V)      | S18        |

|                                        |      |        |       |     |               |     |
|----------------------------------------|------|--------|-------|-----|---------------|-----|
| Co <sub>4</sub> N/CNW/CC               | 1.40 | 174    | 774   | 944 | -             | S19 |
| 1100-CNS                               | 1.49 | 151    | -     | -   | 100 (~ 1.3 V) | S21 |
| C-MOF-C2-900                           | 1.43 | 105    | 768   | 998 | -             | S22 |
| Co-N,B-CSs                             | 1.43 | 100.4  | -     | -   | -             | S23 |
| S-C <sub>2</sub> NA                    | 1.49 | 209    | 863   | 958 | -             | S24 |
| FeN <sub>x</sub> -PNC                  | 1.55 | 278    | -     | -   | -             | S25 |
| CFZr(0.3)/N-rGO                        | 1.39 | -      | 732   | -   | -             | S26 |
| NDGs-800                               | 1.45 | 115.2  | 750.8 | -   | -             | S27 |
| CMO/S-300                              | 1.5  | 152    | -     | -   | -             | S28 |
| Co/Co <sub>3</sub> O <sub>4</sub> @PGS | 1.45 | 118.27 | -     | -   | -             | S29 |
| DN-CP@G                                | 1.43 | 135    | 591   | -   | -             | S30 |
| N-GRW                                  | 1.46 | 65     | 873   | -   | -             | S31 |
| NCNF-1000                              | 1.48 | 185    | 660   | 776 | -             | S32 |
| NC-Co <sub>3</sub> O <sub>4</sub> -90  | 1.44 | -      | -     | -   | -             | S33 |
| FeNi@N-GR                              | 1.48 | 85     | 765   | 920 | -             | S34 |
| PS-CNF                                 | 1.49 | 231    | 698   | 907 | 240 (~1.3 V)  | S36 |
| S-GNS/NiCo <sub>2</sub> S <sub>4</sub> | 1.38 | 216.3  | -     | -   | -             | S62 |
| CNT@POF                                | 1.49 | 237    | 772.7 | -   | -             | S63 |
| PbMnO <sub>x</sub>                     | -    | 40     | -     | -   | 50 (~1.2 V)   | S64 |



|                                 |      |       |     |   |              |     |
|---------------------------------|------|-------|-----|---|--------------|-----|
| N, B-CNT                        | -    | 25    | -   | - | 30 (~1.1 V)  | S65 |
| NiC <sub>2</sub> O <sub>4</sub> | -    | -     | 580 | - | 10 (~1.25 V) | S66 |
| FePc-Py-CNTs                    | -    | -     | -   | - | 100 (~1.2 V) | S67 |
| CoO/N-CNT                       | 1.40 | 265   | 570 | - | -            | S68 |
| CuPt-NC                         | 1.50 | 250   | 560 | - | -            | S69 |
| MnO <sub>x</sub> /C             | 1.40 | 190   | 290 | - | -            | S70 |
| CuS/NiS <sub>2</sub>            | 1.44 | 172.4 | 775 | - | -            | S71 |

---

**Table S8.** Comparison of cycle life operations for CoS<sub>1.8</sub>/SnS<sub>2.8</sub> based ZABs in the alkaline electrolyte compared to those of previous reports.

| Catalyst                                 | Rechargeability                                            | Reference |
|------------------------------------------|------------------------------------------------------------|-----------|
| CoS <sub>1.8</sub> /SnS <sub>2.8</sub>   | 600 s/cycle for >1008 cycles; 168 h@20 mA cm <sup>-2</sup> | This work |
| PEMAC@NDCN                               | 600 s/cycle for 2160 cycles; 360 h@20 mA cm <sup>-2</sup>  | S5        |
| Mn/Fe-HIB-MOFs                           | 600 s/cycle for 6000 cycles; 1000 h@10 mA cm <sup>-2</sup> | S6        |
| Fe/SNCFs-NH <sub>3</sub>                 | 3600 s/cycle for 1000 cycles; 1000 h@1 mA cm <sup>-2</sup> | S7        |
| FeCo SAs@Co/N-GC                         | 600 s/cycle for 1200 cycles; 200 h@10 mA cm <sup>-2</sup>  | S9        |
| Ir@Co <sub>3</sub> O <sub>4</sub>        | 1200 s/cycle for 720 cycles; 240 h@10 mA cm <sup>-2</sup>  | S10       |
| Co-FPOH                                  | 600 s/cycle for 1200 cycles; 450 h@5 mA cm <sup>-2</sup>   | S12       |
| Co@IC/MoC@PC                             | 1200 s/cycle for 300 cycles; 100 h@1 mA cm <sup>-2</sup>   | S13       |
| Nitride/N-Ti <sub>3</sub> C <sub>2</sub> | 3600 s/cycle for 120 cycles; 120 h@20 mA cm <sup>-2</sup>  | S14       |
| PFN PF                                   | 1800 s/cycle for 1000 cycles; 500 h@20 mA cm <sup>-2</sup> | S42       |
| Co <sub>9</sub> S <sub>8</sub> @N,S-C    | 720 s/cycle for 660 cycles; 110 h@1 mA cm <sup>-2</sup>    | S43       |
| FeCo/Se-CNT                              | 1200 s/cycle for 210 cycles; 70 h@5 mA cm <sup>-2</sup>    | S44       |
| Co-TMPyP/CCG                             | 1200 s/cycle for 300 cycles; 100 h@2 mA cm <sup>-2</sup>   | S45       |
| NPMC-1000                                | 600 s/cycle for 600 cycles; 100 h@2 mA cm <sup>-2</sup>    | S16       |
| NiO/CoN PINWs                            | 600 s/cycle for 25 cycles; 8.3 h@50 mA cm <sup>-2</sup>    | S17       |
| P,S-CNS                                  | 720 s/cycle for 500 cycles; 100 h@2 mA cm <sup>-2</sup>    | S18       |
| Co <sub>4</sub> N/CNW/CC                 | 1200 s/cycle for 408 cycles; 136 h@10 mA cm <sup>-2</sup>  | S19       |
| CCO@C                                    | 1800 s/cycle for 160 cycles; 80 h @2 mA cm <sup>-2</sup>   | S20       |
| 1100-CNS                                 | 660 s/cycle for 300 cycles; 55 h @10 mA cm <sup>-2</sup>   | S21       |
| C-MOF-C2-900                             | 1200 s/cycle for 360 cycles; 120 h @2 mA cm <sup>-2</sup>  | S22       |
| Co-N,B-CSs                               | 394 s/cycle for 128 cycles; 14 h @5 mA cm <sup>-2</sup>    | S23       |
| S-C <sub>2</sub> NA                      | 2 h/cycle for 375 cycles; 750 h@10 mA cm <sup>-2</sup>     | S24       |
| FeN <sub>x</sub> -PNC                    | 660 s/cycle for 220 cycles; 40 h @5 mA cm <sup>-2</sup>    | S25       |

|                                               |                                                            |     |
|-----------------------------------------------|------------------------------------------------------------|-----|
| CFZr(0.3)/N-rGO                               | 3600 s/cycle for 11 cycles; 11 h @15 mA cm <sup>-2</sup>   | S26 |
| NDGs-800                                      | 1200 s/cycle for 234 cycles; 78 h @10 mA cm <sup>-2</sup>  | S27 |
| CMO/S-300                                     | 400 s/cycle for 120 cycles; 13 h @5 mA cm <sup>-2</sup>    | S28 |
| Co/Co <sub>3</sub> O <sub>4</sub> @PGS        | 600 s/cycle for 4800 cycles; 800 h @10 mA cm <sup>-2</sup> | S29 |
| DN-CP@G                                       | 3600 s/cycle for 250 cycles; 250 h @5 mA cm <sup>-2</sup>  | S30 |
| N-GRW                                         | 1h/cycle for 160 cycles; 160 h@2 mA cm <sup>-2</sup>       | S31 |
| NCNF-1000                                     | 600 s/cycle for 500 cycles; 83 h@10 mA cm <sup>-2</sup>    | S32 |
| NiCo <sub>2</sub> S <sub>4</sub> /N-CNT       | 400 s/cycle for 150 cycles; 17 h@10 mA cm <sup>-2</sup>    | S33 |
| NC-Co <sub>3</sub> O <sub>4</sub> -90         | 1200 s/cycle for 600 cycles; 200 h@10 mA cm <sup>-2</sup>  | S34 |
| FeNi@N-GR                                     | 1200 s/cycle for 120 cycles; 40 h @20 mA cm <sup>-2</sup>  | S35 |
| PS-CNF                                        | 700 s/cycle for 600 cycles; 120 h @2 mA cm <sup>-2</sup>   | S36 |
| Co <sub>3</sub> O <sub>4</sub> /NPGC          | 1200 s/cycle for 250 cycles; 83 h@5 mA cm <sup>-2</sup>    | S38 |
| PCN-CFP                                       | 600 s/cycle for 50 cycles; 8.3 h@20 mA cm <sup>-2</sup>    | S39 |
| N-GCNT/FeCo-3                                 | 600 s/cycle for 240 cycles; 40 h@125 mA cm <sup>-2</sup>   | S40 |
| S-GNS/NiCo <sub>2</sub> S <sub>4</sub>        | 2400 s/cycle for 150 cycles; 100 h @10 mA cm <sup>-2</sup> | S62 |
| CNT@POF                                       | 1200 s/cycle for 200 cycles; 67 h @2 mA cm <sup>-2</sup>   | S63 |
| CoO/N-CNT + NiFe                              | 10 h/cycle for 10 cycles; 200 h@20 mA cm <sup>-2</sup>     | S68 |
| LDH/Ni                                        |                                                            |     |
| CuS/NiS <sub>2</sub>                          | 1800 s/cycle for 500 cycles; 83 h @25 mA cm <sup>-2</sup>  | S70 |
| macro/meso-NC-NH <sub>3</sub> +               | 4 h/cycle for 200 cycles; 800 h@10 mA cm <sup>-2</sup>     | S72 |
| COMT@Ni                                       |                                                            |     |
| Co <sub>3</sub> O <sub>4</sub> NWs            | 600 s/cycle for 100 cycles; 17 h@50 mA cm <sup>-2</sup>    | S73 |
| NCNT/CoO-NiO-NiCo                             | 600 s/cycle for 100 cycles; 17 h@20 mA cm <sup>-2</sup>    | S74 |
| LBSCFO-50                                     | 600 s/cycle for 100 cycles; 17 h@10 mA cm <sup>-2</sup>    | S75 |
| Ni <sub>6/7</sub> Fe <sub>1/7</sub> -OH-6/CNT | 600 s/cycle for 150 cycles; 25 h@15 mA cm <sup>-2</sup>    | S76 |
| NiCo/PFC                                      | 2 h/cycle for 300 cycles; 600 h@10 mA cm <sup>-2</sup>     | S77 |
| Ni <sub>3</sub> Fe/N-C                        | 4 h/cycle for 105 cycles; 420 h@10 mA cm <sup>-2</sup>     | S78 |

|                                       |                                                           |     |
|---------------------------------------|-----------------------------------------------------------|-----|
| NiO/Ni(OH) <sub>2</sub>               | 70 min/cycle for 70 cycles; 82 h@1 mA cm <sup>-2</sup>    | S79 |
| Fe@NC                                 | 600 s/cycle for 100 cycles; 17 h@10 mA cm <sup>-2</sup>   | S80 |
| BNC                                   | 600 s/cycle for 66 cycles; 11 h@20 mA cm <sup>-2</sup>    | S81 |
| c-CoMn <sub>2</sub> /C                | 400 s/cycle for 155 cycles; 17 h@10 mA cm <sup>-2</sup>   | S82 |
| CCBC-2                                | 600 s/cycle for 75 cycles; 12.5 h@2 mA cm <sup>-2</sup>   | S83 |
| RuSn73                                | 600 s/cycle for 100 cycles; 16.6 h@10 mA cm <sup>-2</sup> | S84 |
| α-MnO <sub>2</sub> /CNT <sub>10</sub> | 300 s/cycle for 100 cycles; 8.33 h@10 mA cm <sup>-2</sup> | S85 |

---

**Table S9.** Comparison of flexible CoS<sub>1-δ</sub>/SnS<sub>2-δ</sub> based ZABs performances in reference to those of previous champion catalysts and electrolytes.

| Catalyst                               | Electrolyte                                              | Power density<br>(mW cm <sup>-2</sup> ) | Specific<br>capacity<br>(mAh g <sub>Zn</sub> <sup>-1</sup> ) | Energy<br>density<br>(Wh kg <sub>Zn</sub> <sup>-1</sup> ) | Recharge ability                       | Reference |
|----------------------------------------|----------------------------------------------------------|-----------------------------------------|--------------------------------------------------------------|-----------------------------------------------------------|----------------------------------------|-----------|
| CoS <sub>1-δ</sub> /SnS <sub>2-δ</sub> | CBCs                                                     | 229                                     | 810                                                          | 1077                                                      | 10 min/cycle for >690 cycles; 115 h@50 | This work |
| PEMAC@NDCN                             | CBCs                                                     | 211                                     | 806                                                          | 1056                                                      | 10 min/cycle for 2580 cycles; 430 h@50 | S5        |
| Mn/Fe-HIB-MOF                          | Functionalized Bio-cellulose membrane                    | 193                                     | 748                                                          | 975                                                       | 10 min/cycle for 3600 cycles; 600 h@25 | S6        |
| FeCo SAs@Co/N-GC                       | Functionalized Bio-cellulose                             | 186                                     | 817                                                          | 1017                                                      | 10 min/cycle for 684 cycles; 114 h@50  | S9        |
| CPS(101)                               | CBCs                                                     | 458                                     | -                                                            | -                                                         | 8 min/cycle for 6000 cycles; 800 h@25  | S8        |
| Fe/SNCFs-NH <sub>3</sub>               | (PANA)-KOH-Zn(CH <sub>3</sub> COO) <sub>2</sub> hydrogel | -                                       | -                                                            | -                                                         | 30 min/cycle for 120 cycles; 60 h@1    | S7        |
| FeCo/Se-CNT                            | PVA gel                                                  | 37.5                                    | -                                                            | -                                                         | 10 min/cycle for 120 cycles; 20 h@5    | S60       |
| Fe <sub>1</sub> /d-CN                  | PVA gel                                                  | 78                                      | -                                                            | -                                                         | 20 min/cycle for 60                    | S86       |

|                                          |                               |      |       |       |                                         |                |  |
|------------------------------------------|-------------------------------|------|-------|-------|-----------------------------------------|----------------|--|
|                                          |                               |      |       |       |                                         | cycles; 20 h@1 |  |
| Nitride/N-Ti <sub>3</sub> C <sub>2</sub> | PVA gel                       | 27   | 630   | 693   | 60 min/cycle for 120 cycles; 120 h@20   | S14            |  |
| CuSA@HNCNx                               | Functionalized Bio-cellulose  | 212  | 806   | 1031  | 10 min/cycle for 1500 cycles; 250 h@ 25 | S87            |  |
| Co <sub>4</sub> N/CNW/CC                 | PVA gel                       | -    | -     | -     | 20 min/cycle for 36 cycles; 12 h        | S19            |  |
| Co-N <sub>4</sub> B-CSs                  | PVA gel                       | -    | -     | -     | 6 min/cycle for 230 cycles; 23 h@2      | S23            |  |
| S-C <sub>2</sub> NA                      | Functionalized Cellulose film | 187  | 695   | 862   | 30 min/cycle for 900 cycles; 450 h      | S24            |  |
| CMO/S-300                                | PVA gel                       | -    | -     | -     | 30 min/cycle for 20 cycles; 10 h@1      | S28            |  |
| DN-CP@G                                  | PVA gel                       | -    | 530   | -     | 60 min/cycle for 170 cycles; 170 h@1    | S30            |  |
| NCNF-1000                                | PVA gel                       | -    | 378   | 378   | 10 min/cycle for 48 cycles; 8 h@1       | S32            |  |
| NC-Co <sub>3</sub> O <sub>4</sub> -90    | Acrylic acid gel              | 82   | 387.2 | 387.2 | 24 min/cycle for 60 cycles; 24 h@1      | S34            |  |
| FeNi@N-GR                                | PVA gel                       | -    | -     | -     | 20 min/cycle for 54 cycles; 18 h        | S35            |  |
| N-GCNT/FeCO-3                            | PVA gel                       | 97.8 | -     | -     | 10 min/cycle for 72 cycles; 12 h        | S40            |  |

|                                         |                    |      |       |       |                                             |     |
|-----------------------------------------|--------------------|------|-------|-------|---------------------------------------------|-----|
| CNT@POF                                 | PVA gel            | -    | -     | -     | 4 min/cycle for 12 cycles; 48 min           | S63 |
| CuS/NiS <sub>2</sub>                    | PVA gel            | -    | -     | -     | 10 min/cycle for 150 cycles; 25 h           | S71 |
| Co <sub>3</sub> O <sub>4</sub> -NCNT/SS | Cellulose film     | 162  | 652.6 | 847.6 | 20 min/cycle for 1500 cycles; 500<br>h@25   | S88 |
| MnO <sub>x</sub> -GCC                   | Acrylic acid gel   | 32   | -     | -     | 20 min/cycle for 200 cycles; 66.66<br>h@0.7 | S89 |
| Co <sub>3</sub> O <sub>4</sub>          | Cellulose membrane | -    | -     | -     | 1 h/cycle for 35 cycles; 35 h@250           | S90 |
| LaNiO <sub>3</sub> /NCNT                | PVA gel            | 56.1 | 460   | 581   | 20 min/cycle for 120 cycles; 40<br>h@50     | S91 |

---

**Table S10.** Flexible ZABs performance comparison for wide temperature operations in reference to those of previous reports.

| Catalyst                               | Electrolyte | Lowest working temperature (°C) | Working temperature (°C) | Power density (mW/cm <sup>2</sup> ) | Specific capacity (mAh g <sub>Zn</sub> <sup>-1</sup> ) | Energy density (Wh kg <sub>Zn</sub> <sup>-1</sup> ) | Rechargeability @mA cm <sup>-2</sup> | References |
|----------------------------------------|-------------|---------------------------------|--------------------------|-------------------------------------|--------------------------------------------------------|-----------------------------------------------------|--------------------------------------|------------|
| CoS <sub>1-δ</sub> /SnS <sub>2-δ</sub> | CBCs        | -40                             | 25                       | 229                                 | 810                                                    | 1077                                                | 690 cycles (115 h) @50               | This work  |
|                                        |             |                                 | -40                      | 194                                 | 685 (85%)                                              | 860                                                 | 264 cycles (44 h) @50<br>(~80%)      |            |
| PEMAC@NDCN                             | CBCs        | -40                             | 70                       | 211                                 | 806                                                    | 1056                                                | 2580 cycles (430 h) @50              | S5         |
|                                        |             |                                 | -40                      | 165                                 | 693 (86%)                                              | 738                                                 | 550 cycles (91 h) @25<br>(~70%)      |            |
| CPS(101)                               | CBCs        | -20                             | 80                       | 458                                 | 1.24 Ah                                                | -                                                   | 6000 cycles (800 h) @25              | S8         |
|                                        |             |                                 | -20                      | -                                   | 1 Ah                                                   | -                                                   | 1500 cycles (200 h) @25              |            |
| FeMn-DSAC                              | PAM         | -40                             | 25                       | 184                                 | 734                                                    | 888                                                 | 218 cycles (80 h) @2                 | S92        |
|                                        |             |                                 | -40                      | 30                                  | 631 (86%)                                              | 725                                                 | 218 cycles (80 h) @2<br>(81.6%)      |            |
| NiO/CoO TINWs                          | PVA         | -10                             | 25                       | -                                   | 842                                                    | 996                                                 | 33 h @1                              | S93        |
|                                        |             |                                 | -10                      | -                                   | 328 (39%)                                              | 364                                                 | 14 h @1<br>(36%)                     |            |
| Co@NPCP/NBCNF-2-800                    | PAM         | -50                             | 25                       | 165                                 | 800                                                    | 960                                                 | 600 cycles (100 h) @2                | S94        |
|                                        |             |                                 | -50                      | 97                                  | 620 (77%)                                              | -                                                   | 240 cycles (40 h) @2                 |            |



|                           |         |     |     |     |           |     |                       |     |
|---------------------------|---------|-----|-----|-----|-----------|-----|-----------------------|-----|
| BFC-FC-0.2                | PAA     | -20 | 25  | 160 | 745       | 915 | 600 cycles (105 h) @2 | S95 |
|                           |         |     | -20 | 80  | 691 (92%) | 798 | -                     |     |
| Pt/C + Ir/C               | KOH     | -20 | 20  | 126 | -         | -   | 210 cycles @5         | S96 |
|                           | CsOH    |     | -20 | 43  | -         | -   | 255 cycles @5         |     |
| Pt/RuO <sub>2</sub>       | PAM     | -40 | 20  | 43  | 818       | -   | 75 h @2               | S97 |
|                           |         |     | -40 | 10  | 743 (90%) | -   | 40 h @2               |     |
| Pt/C and RuO <sub>2</sub> | PAM/PAA | -20 | 25  | 12  | 663       | 769 | 100 cycles (10 h) @1  | S98 |
|                           |         |     | -20 | 8   | 506 (76%) | 556 | 100 cycles (10 h) @1  |     |

## 2. Computational details and modeling

All *ab initio* calculations were performed with the Vienna *Ab initio* Simulation Package (VASP 5.4.4).<sup>S99-S102</sup> We used the projector augmented wave (PAW) method<sup>S103-S104</sup> with the generalized gradient approximation based on the Perdew-Burke-Ernzerhof (PBE)<sup>S105</sup> functional (GGA).<sup>S106</sup> A plane-wave cutoff energy of 500 eV was used. Lattice constants and internal atomic positions were fully optimized until the residual forces were less than 0.02 eV/Å. The spin polarization was also included. Integration in the Brillouin zone was performed based on the Monkhorst-Pack scheme<sup>S107</sup> using a k-point mesh with an interval of 0.05 Å<sup>-1</sup>. For the HER and OER/ORR calculations, we specifically used CoS and SnS<sub>2</sub> with hexagonal phases and P6<sub>3</sub>/mmc, which can minimize the lattice mismatching. The vacuum slab space of a unit cell in the z-direction was set to 15 Å to avoid interactions between layers. DFT-D3 with Becke-Jonson (BJ) damping was used to study the adsorption of intermediates on the surface while considering van der Waals interactions. Further, we investigated the reaction free energies ( $\Delta G$ ) of the elementary steps for the HER and OER/ORR at U=0 V and U=0.402 V (ideal potential), respectively. For the convenience of identifying the active site positions, we name them by element name and Arabic number. The details of the active site naming are also included in Fig. S12. Bader charge analysis is widely used for investigating charge distribution, and it is determined by the zero-gradient surface of electron density between ions. In this study, we performed Bader charge analysis using grid-based charge density decomposition, as developed by Henkelman et al.<sup>S108</sup>

### Gibbs free energy calculations for HER and OER/ORR processes

In this work, we used the theoretically well-defined free energy diagram (FED) approach proposed by Norskov group, and computational hydrogen electrode (CHE) model to calculate a reaction free energy for electrochemical reactions. It has been generally accepted approach for the electrochemical studies based on density functional theory (DFT) calculations. Based on this theoretical method, the chemical potential of proton and electron pair ( $\mu(H^+ + e^-)$ ) is estimated from the half of chemical potential of  $H_2$  gas at pH 0, and it can be shifted by  $-eU$  when the external potential U is applied, i.e.,  $\mu(H^+ + e^-) = 0.5\mu(H_2) - eU$ . For the investigation of various catalytic reactions on the specific surface structures, we mainly consider

the thermodynamic stabilities of the adsorbents as the main descriptor, which determines the catalytic performance.

Preferentially, the hydrogen evolution reaction (HER) is a multi-step process that generates  $H_2$  gas via two proposed mechanisms, Volmer-Tafel and Volmer-Heyrovsky.

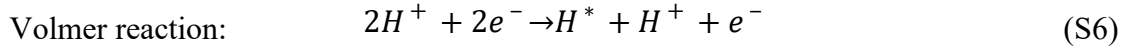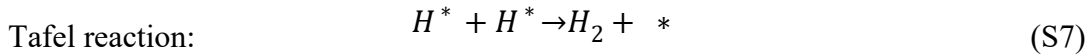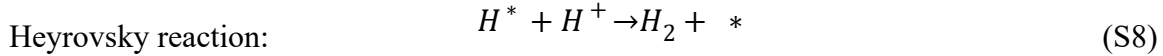

where  $*$  and  $H^*$  indicate the active site and adsorbed H atom on the catalyst surface, respectively. Since the equilibrium reduction potential for the HER is 0.0 V, the chemical potentials of the initial ( $2H^+ + 2e^-$ ) and final states ( $H_2$ ) should be same. As such, in the case of ideal catalyst, its intermediate state should have the same chemical potential as the initial and final states under equilibrium potential, i.e.,  $U = 0.0$  V. However, the actual catalytic cases deviate from the ideal behavior due to the binding strength of the intermediate on the surface of catalyst. Therefore, the optimum value of reaction Gibbs free energy of intermediate ( $H^*$ ) should be zero for a spontaneous reaction without a barrier.

Subsequently, in the case of oxygen evolution reaction (OER), the four electrons/four reaction steps have been generally acceptable, where this process in an alkaline environment can be described as follows.

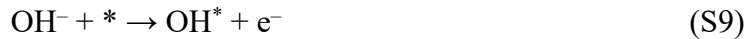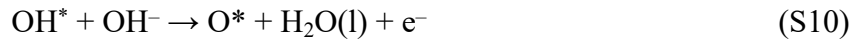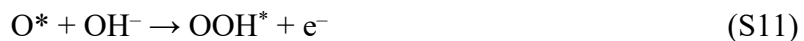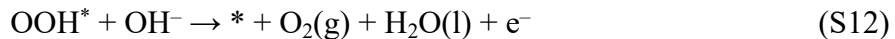

where  $*$  refer to the active site, and  $OH^*$ ,  $O^*$ , and  $OOH^*$  are adsorbed intermediates on the surface of catalyst.

In contrast to the OER, the ORR can proceed either by a two-step or four-step pathway depending on the relative stabilities of the  $O^*$  and  $OOH^*$  intermediates generated after the adsorption of  $O_2$  on the catalyst. The two-step ORR pathway in an alkaline environment is summarized using the following elementary steps:

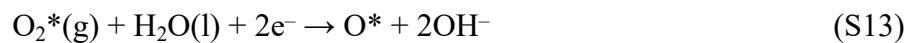

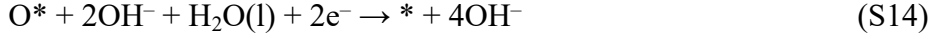

whereas the four-step pathway has following elementary steps:

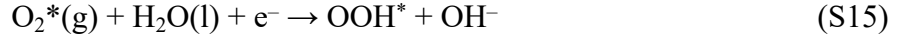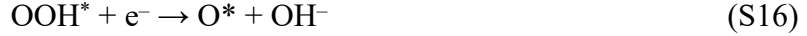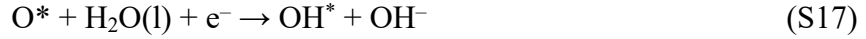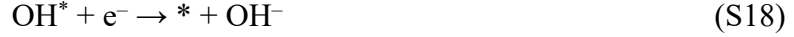

Considering the elementary reaction steps for the ORR, both reaction pathways lead to the same final products ( $4\text{OH}^-$ ), but different intermediate states upon adsorption of  $\text{O}_2$  on the catalyst ( $\text{O}^*$  in Eqs. (S13 and S15) and  $\text{OOH}^*$  in Eq. (S16)) are involved. Therefore, it is important to note that the transformations of  $\text{O}_2^*$  to  $\text{O}^*$  in Eq. (S13) or  $\text{O}_2^*$  to  $\text{OOH}^*$  in Eq. (S15) are the important steps that determine which ORR pathway is followed.

To investigate the reaction free energy between each elementary steps including proton and electron transfer, we set the standard reaction conditions (298.15 K and 1 atm) as the reference potential. The  $\Delta G$  value of each elementary step in the HER and NRR can be obtained by:  $\Delta G = \Delta E + \Delta E_{ZPE} - T\Delta S + \Delta G_U + \Delta G_{pH}$ , where  $\Delta E$  that indicates the reaction energy, T is absolute temperature, and  $\Delta E_{ZPE}$  and  $\Delta S$  are the change in the zero-point energies and entropy, respectively. And,  $E_{ZPE}$  and S values can be computed from the vibrational frequency values of the adsorbed species, which are evaluated from finite-difference calculations. Notably, the entropies of the reference gas molecules ( $\text{H}_2$ , and  $\text{H}_2\text{O}$ ) were taken from the NIST database.  $\Delta G_{pH}$  is the contribution of  $\text{H}^+$ , which can be determined as:  $\kappa_B T * \ln(10) * pH$ , where  $\kappa_B$  is the Boltzmann constant, and in this work, the value of pH was set to 0.  $\Delta G_U$  indicates the effect of the applied bias at electrode, which is equal to  $-neU$ , in which  $n$  is the number of transferred electrons in each step. So, we used limiting potential ( $U_L$ ) to assess the NRR catalytic activity, which can be determined by:  $U_L = -\max(\Delta G_1, \Delta G_2, \Delta G_3, \dots, \Delta G_i)/e$ , where  $\Delta G_i$  means the reaction free energy between each elementary step in the whole HER and OER/ORR processes.

## Supplementary References

- S1 Y. Liang, H. Wang, J. Zhou, Y. Li, J. Wang, T. Regier, H. Dai, *J. Am. Chem. Soc.*, 2012, **134**, 3517–3523.
- S2 Paulus, U. Schmidt, T. and Gasteiger, H. R. Behm, *J. Electroanal. Chem.*, 2001, **495**, 134.
- S3 S. Zecevic, J. Wainright, M. Litt, S. Gojkovic, R. Savinell, *J. Electrochem. Soc.*, 1997, **144**, 2973–2982.
- S4 O. Antoine, R. Durand, *J. Appl. Electrochem.*, 2000, **30**, 839–844.
- S5 N. Wagh, S. Shinde, C. Lee, S. Kim, D. Kim, H. Um, S. Lee, J. Lee, *Nano-Micro Lett.*, 2022, **14**, 190.
- S6 S. Shinde, C. Lee, J. Jung, N. Wagh, S. Kim, D. Kim, C. Lin, S. Lee, J. Lee, *Energy Environ. Sci.*, 2019, **12**, 727-738.
- S7 L. Yang, X. Zhang, L. Yu, J. Hou, Z. Zhou, R. Lv, *Adv. Mater.* 2105410 (2021).
- S8 S. Shinde, J. Jung N. Wagh, C. Lee, S. Kim, S. Lee, J. Lee, *Nat. Energy* 6, 592-604 (2021).
- S9 N. Wagh, D. Kim, S. Kim, S. Shinde, J. Lee, *ACS Nano* **15**, 14683–14696 (2021).
- S10 Y. Dai, J. Yu, J. Wang, Z. Shao, D. Guan, Y. Huang, M. Ni, *Adv. Funct. Mater.* 2111989 (2022).
- S11 H. Jiang, J. Xia, L. Jiao, X. Meng, P. Wang, C. Lee, W. Zhang, *Appl. Catal. B: Environ.* **310**, 121352 (2022).
- S12 L. Song, T. Zheng, L. Zheng, B. Lu, H. Chen, Q. He, W. Zheng, Y. Hou, J. Lian, Y. Wu, J. Chen, Z. Ye, J. Lu, *Appl. Catal. B: Environ.* **300**, 120712 (2022).
- S13 L. Zhang, Y. Zhu, Z. Nie, Z. Li, Y. Ye, L. Li, J. Hong, Z. Bi, Y. Zhou, G. Hu, *ACS Nano* **15**, 13399–13414 (2021).
- S14 Z. Wu, H. Wang, P. Xiong, G. Li, T. Qiu, W. Gong, F. Zhao, C. Li, Q. Li, G. Wang, F. Geng, *Nano Lett.* **20**, 2892-2898 (2020).
- S15 K. Tang, C. Yuan, Y. Xiong, H. Hu, M. Wu, *Appl. Catal. B: Environ.* **260**, 118209 (2020).
- S16 Zhang, J.; Zhao, Z.; Xia, Z.; Dai, L. *Nat. Nanotechnol.* 2015, **10**, 444-452.
- S17 Yin, J.; Li, Y.; Lv, F.; Fan, Q.; Zhao, Y.; Zhang, Q.; Wang, W.; Cheng, F.; Xi, P.; Guo, S. *ACS Nano* 2017, 11, 2275–2283.
- S18 Shinde, S.; Lee, C.; Sami, A.; Kim, D.; Lee, S.; Lee, J. *ACS Nano* 2017, **11**, 347–357.

- S19 Meng, F.; Zhong, H.; Bao, D.; Yan, J.; Zhang X. *J. Am. Chem. Soc.* 2016, **138**, 10226–10231.
- S20 Wang, X.; Li, Y.; Jin, T.; Meng, J.; Jiao, L.; Zhu, M.; Chen, J. *Nano Lett.* 2017, **17**, 7989–7994.
- S21 Pei, Z.; Li, H.; Huang, Y.; Xue, Q.; Huang, Y.; Zhu, M.; Wang, Z.; Zhi, C. *Energy Environ. Sci.* 2017, **10**, 742-749.
- S22 Zhang, M.; Dai, Q.; Zheng, H.; Chen, M.; Dai, L. *Adv. Mater.* 2018, **30**, 1705431.
- S23 Guo, Y.; Yuan, P.; Zhang, J.; Hu, Y.; Amiin, I.; Wang, X.; Zhou, J.; Xia, H.; Song, Z.; Xu, Q.; Mu, S. *ACS Nano* 2018, 12, 1894–1901.
- S24 Shinde, S.; Lee, C.; Yu, J.; Kim, D.; Lee, S.; Lee, J. *ACS Nano* 2018, 12, 596–608.
- S25 Ma, L.; Chen, S.; Pei, Z.; Huang, Y.; Liang, G.; Mo, F.; Yang, Q.; Su, J.; Gao, Y.; Zapien, J.; Zhi, C. *ACS Nano* 2018, 12, 1949–1958.
- S26 Kashyap, V.; Kurungot, S. *ACS Catal.* 2018, 8, 3715–3726.
- S27 Wang, Q.; Ji, Y.; Lei, Y.; Wang, Y.; Wang, Y.; Li, Y.; Wang, S. *ACS Energy Lett.* 2018, 3, 1183–1191.
- S28 Peng, S.; Han, X.; Li, L.; Chou, S.; Ji, D.; Huang, H.; Du, Y.; Liu, J.; Ramakrishna, S. *Adv. Energy Mater.* 2018, 8, 1800612.
- S29 Jiang, Y.; Deng, Y.; Fu, J.; Lee, D.; Liang, R.; Cano, Z.; Liu, Y.; Bai, Z.; Hwang, S.; Yang, L.; Su, D.; Chu, W.; Chen, Z. *Adv. Energy Mater.* 2018, 8, 1702900.
- S30 Hang, C.; Zhang, J.; Zhu, J.; Li, W.; Kou, Z.; Huang, Y. *Adv. Energy Mater.* 2018, 8, 1703539.
- S31 Yang, H.; Miao, J.; Hung, S.; Chen, J.; Tao, H.; Wang, X.; Zhang, L.; Chen, R.; Gao, J.; Chen, H.; Dai, L.; Liu, B. *Sci. Adv.* 2016, 2, e1501122.
- S32 Liu, Q.; Wang, Y.; Dai, L.; Yao, J. *Adv. Mater.* 2016, 28, 3000–3006.
- S33 Han, X.; Wu, X.; Zhong, C.; Deng, Y.; Zhao, N.; Hu, W. *Nano Energy* 2017, 31, 541–550.
- S34 Guan, C.; Sumboja, A.; Wu, H.; Ren, W.; Liu, X.; Zhang, H.; Liu, Z.; Cheng, C.; Pennycook, S.; Wang, J. *Adv. Mater.* 2017, 29, 1704117.
- S35 Liu, P.; Gao, D.; Xiao, W.; Ma, L.; Sun, K.; Xi, P.; Xue, D.; Wang, J. *Adv. Funct. Mater.* 2018, 28, 1706928.
- S36 Shinde, S.; Yu, J.; Song, J.; Nam, Y.; Kim, D.; Lee, J. *Nanoscale Horiz.* 2017, 2, 333-341.

- S37 Chen, P.; Zhou, T.; Xing, L.; Xu, K.; Tong, Y.; Xie, H.; Zhang, L.; Yan, W.; Chu, W.; Wu, C.; Xie, Y. *Angew. Chem., Int. Ed.* 2017, **56**, 610–614.
- S38 Li, G.; Wang, X.; Fu, J.; Li, J.; Park, M.; Zhang, Y.; Lui, G.; Chen, Z. *Angew. Chem., Int. Ed.* 2016, **55**, 4977–4982.
- S39 Ma, T.; Ran, J.; Dai, S.; Jaroniec, M.; Qiao, S. *Angew. Chem., Int. Ed.* 2015, **54**, 4646–4650.
- S40 Su, C.; Cheng, H.; Li, W.; Liu, Z.; Li, N.; Hou, Z.; Bai, F.; Zhang, H.; Ma, T. *Adv. Energy Mater.* 2017, **7**, 1602420.
- S41 Mao, S.; Wen, Z.; Huang, T.; Hou, Y.; Chen, J. *Energy Environ. Sci.* 2014, **7**, 609–616.
- S42. Q. Hu, G. Li, G. Li, X. Liu, B. Zhu, X. Chai, Q. Zhang, J. Liu, and C. He, *Adv. Energy Mater.*, 2019, **9**, 1803867.
- S43. T. Tam, S. Kang, M. Kim, S. Lee, S. Hur, J. Chung, and W. Cho, *Adv. Energy Mater.*, 2019, **9**, 1900945.
- S44. Z. Yang, C. Zhao, Y. Qu, H. Zhou, F. Zhou, J. Wang, Y. Wu, and Y. Li, *Adv. Mater.*, 2019, **31**, 1808043.
- S45. H. Han, Z. Bai, T. Zhang, X. Wang, X. Yang, X. Ma, Y. Zhang, L. Yang, J. Lu, *Nano Energy*, 2019, **56**, 724–732.
- S46. J. Mahmood, F. Li, S. Jung, M. Okyay, I. Ahmad, S. Kim, N. Park, H. Jeong & J. Baek, *Nat. Nanotechnol.*, 2017, **12**, 441–446.
- S47. J. Staszak-Jirkovský, C. Malliakas, P. Lopes, N. Danilovic, S. Kota, K. Chang, B. Genorio, D. Strmcnik, V. Stamenkovic, M. Kanatzidis & N. Markovic, *Nature Mater.*, 2016, **15**, 197–203.
- S48. Q. Lu, G. Hutchings, W. Yu, Y. Zhou, R. Forest, R. Tao, J. Rosen, B. Yonemoto, Z. Cao, H. Zheng, J. Xiao, F. Jiao, & J. Chen, *Nature Comm.*, 2015, **6**, 6567.
- S49. Z. Yu, C. Lang, M. Gao, Y. Chen, Q. Fu, a Y. Duana and S. Yu, *Energy Environ. Sci.*, 2018, **11**, 1890-1897.
- S50. Z. Ibupoto, A. Tahira, P. Tang, X. Liu, J. Morante, M. Fahlman, J. Arbiol, M. Vagin, A. Vomiero, *Adv. Funct. Mater.*, 2019, **29**, 1807562.
- S51. K. Xu, H. Cheng, H. Lv, J. Wang, L. Liu, S. Liu, X. Wu, W. Chu, C. Wu, Y. Xie, *Adv. Mater.*, 2018, **30**, 1703322.
- S52. Y. Huang, L. Hu, R. Liu, Y. Hu, T. Xiong, W. Qiu, M. Balogun, A. Pan, Y. Tong, *Appl. Catal. B: Environ.*, 2019, **251**, 181–194.

- S53. Y. Zhu, H. Chen, C. Hsu, T. Lin, C. Chang, S. Chang, L. Tsai, and H. Chen, *ACS Energy Lett.*, 2019, **4**, 987–994.
- S54. S. Jing a, L. Zhang a b, L. Luo b, J. Lu b, S. Yin b, P. Shen b, P. Tsiakaras, *Applied Catalysis B: Environmental*, 2018, **224**, 533–540.
- S55. M. Zhang, J. Chen, H. Li, P. Cai, Y. Li, Z. Wen, *Nano Energy*, 2019, **61**, 576–583.
- S56. Q. Fu, J. Dai, X. Huang, Y. Dai, Y. Pan, L. Yang, Z. Sun, T. Miao, M. Zhou, L. Zhao, W. Zhao, X. Han, J. Lu, H. Gao, X. Zhou, Y. Wang, Z. Ni, W. Ji, Y. Huang, *Adv. Mater.*, 2022, **34**, 2204247.
- S57. A. Yang, K. Su, W. Lei, Y. Tang, X. Qiu, *Adv. Energy Mater.*, 2023, **13**, 2203150.
- S58 G. Wang, J. Chang, S. Koul, A. Kushima, Y. Yang, *J. Am. Chem. Soc.* **143**, 11595–11601 (2021).
- S59. D. Lyu, S. Yao, A. Ali, Z. Tian, P. Tsiakaras, P. Shen, *Adv. Energy Mater.* **11**, 2101249 (2021).
- (S60) H. Zhang, M. Zhao, H. Liu, S. Shi, Z. Wang, B. Zhang, L. Song, J. Shang, Y. Yang, C. Ma, L. Zheng, Y. Han, W. Huang, *Nano Lett.* **21**, 2255–2264 (2021).
- (S61) K. Cui, Q. Wang, Z. Bian, G. Wang, Y. Xu, *Adv. Energy Mater.* **11**, 2102062 (2021).
- (S62) Liu, W.; Zhang, J.; Bai, Z.; Jiang, G.; Li, M.; Feng, K.; Yang, L.; Ding, Y.; Yu, T.; Chen, Z.; Yu, A. *Adv. Funct. Mater.* 2018, 28, 1706675.
- (S63) Li, B.; Zhang, S.; Wang, B.; Xia, Z.; Tang, C.; Zhang, Q. *Energy Environ. Sci.* 2018, 11, 1723-1729.
- (S64) Yang, T.; Venkatesan, S.; Lien, C.; Chang, J.; Zen, J. *Electrochim. Acta*, 2011, 56, 6205–6210.
- (S65) Liu, Y.; Chen, S.; Quan, X.; Yu, H.; Zhao, H.; Zhang, Y.; Chen, G. *J. Phys. Chem. C* 2013, 117, 14992–14998.
- (S66) Prabu, M.; Ketpang, K.; Shanmugam, S. *Nanoscale*, 2014, 6, 3173–3181.
- (S67) Cao, R.; Thapa, R.; Kim, H.; Xu, X.; Kim, M.; Li, Q.; Park, N.; Liu, M.; Cho, J. *Nat. Commun.* 2013, 4, 2076.
- (S68) Li, Y.; Gong, M.; Liang, Y.; Feng, J.; Kim, J.; Wang, H.; Hong, G.; Zhang, B.; Dai, H. *Nat. Commun.* 2013, 4, 1805.
- (S69) Dhavale, V.; Kurungot, S. *ACS Catal.* 2015, 5, 1445–1452.



- (S70) Lee, J.; Park, G.; Lee, H.; Kim, S.; Cao, R.; Liu, M.; Cho, J. *Nano Lett.* 2011, 11, 5362–5366.
- (S71) An, L.; Li, Y.; Luo, M.; Yin, J.; Zhao, Y.; Xu, C.; Cheng, F.; Yang, Y.; Xi, P.; Guo, S. *Adv. Funct. Mater.* 2017, 27, 1703779.
- (S72) Li, L.; Liu, C.; He, G.; Fan, D.; Manthiram, A. *Energy Environ. Sci.* 2015, 8, 3274–3282.
- (S73) Lee, D.; Choi, J.; Feng, K.; Park, H.; Chen, Z. *Adv. Energy Mater.* 2014, 4, 1301389.
- S74. Liu, X.; Park, M.; Kim, M.; Gupta, S.; Wu, G.; Cho, J. *Angew. Chem., Int. Ed.* 2015, 54, 9654–9658.
- S75. Jung, J.; Risch, M.; Park, S.; Kim, M.; Nam, G.; Jeong, H.; Horn, Y.; Cho, J. *Energy Environ. Sci.* 2016, 9, 176–183.
- S76. Wang, T.; Nam, G.; Jin, Y.; Wang, X.; Ren, P.; Kim, M.; Liang, J.; Wen, X.; Jang, H.; Han, J.; Huang, Y.; Li, Q.; Cho, J. *Adv. Mater.* 2018, 30, 1800757.
- (S77) Fu, G.; Chen, Y.; Cui, Z.; Li, Y.; Zhou, W.; Xin, S.; Tang, Y.; Goodenough, J. *Nano Lett.* 2016, 16, 6516–6522.
- (S78) Fu, G.; Cui, Z.; Chen, Y.; Li, Y.; Tang, Y.; Goodenough, J. *Adv. Energy Mater.* 2017, 7, 1601172.
- (S79) Lee, D.; Fu, J.; Park, M.; Liu, H.; Kashkooli, A.; Chen, Z. *Nano Lett.* 2016, 16, 1794–1802.
- (S80) Wang, J.; Wu, H.; Gao, D.; Miao, S.; Wang, G.; Bao, X. *Nano Energy* 2015, 13, 387–396.
- (S81) Zhuang, X.; Gehrig, D.; Forler, N.; Liang, H.; Wagner, M.; Hansen, M.; Laquai, F.; Zhang, F.; Feng, X. *Adv. Mater.* 2015, 27, 3789–3796.
- (S82) Li, C.; Han, X.; Cheng, F.; Hu, Y.; Chen, C.; Chen, J. *Nat. Commun.* 2015, 6, 7345.
- (S83) Chen, Z.; Yu, A.; Higgins, D.; Li, H.; Wang, H.; Chen, Z. *Nano Lett.* 2012, 12, 1946–1952.
- (S84) T. You and C. Hu, *ACS Appl. Mater. Interfaces* 2018, 10, 10064–10075.
- (S85) P. Li, C. Hu, T. You, P. Chen, *Carbon*, 2017, 111, 813-821.
- S86. M. Zhao, H. Liu, H. Zhang, W. Chen, H. Sun, Z. Wang, B. Zhang, L. Song, Y. Yang, C. Ma, Y. Han, W. Huang, *Energy Environ. Sci.*, **14**, 6455–6463 (2021).
- S87. N. Wagh, S. Shinde, C. Lee, J. Jung, D. Kim, S. Kim, C. Lin, S. Lee, J. Lee, *Appl. Catal. B: Environ.* **268**, 118746 (2020).

- S88. Fu, J.; Hassan, F.; Li, J.; Lee, D.; Ghannoum, A.; Lui, G.; Hoque, M.; Chen, Z. *Adv. Mater.* 2016, 28, 6421–6428.
- S89. Sumboja, A.; Lübke, M.; Wang, Y.; An, T.; Zong, Y.; Liu, Z. *Adv. Energy Mater.* 2017, 7, 1700927.
- S90. Fu, J.; Zhang, J.; Song, X.; Zarrin, H.; Tian, X.; Qiao, J.; Rasen, L.; Lib, K.; Chen, Z. *Energy Environ. Sci.* 2016, 9, 663–670.
- S91. Fu, J.; Lee, D.; Hassan, F.; Yang, L.; Bai, Z.; Park, M.; Chen, Z. *Adv. Mater.* 2015, 27, 5617–5622.
- S92. T. Cui, Y. Wang, T. Ye, J. Wu, Z. Chen, J. Li, Y. Lei, D. Wang, Y. Li, *Angew. Chem. Int. Ed.*, 2022, **61**, e202115219.
- S93. L. An, B. Huang, Y. Zhang, R. Wang, N. Zhang, T. Dai, P. Xi, C. Yan, *Angew. Chem. Int. Ed.*, 2019, **58**, 9459.
- S94. C. Gu, X. Xie, Y. Liang, J. Li, H. Wang, K. Wang, J. Liu, M. Wang, Y. Zhang, M. Li, H. Kong, and C. Liu, *Energy Environ. Sci.*, 2021, **14**, 4451.
- S95. Z. Pei, Z. Yuan, C. Wang, S. Zhao, J. Fei, L. Wei, J. Chen, C. Wang, R. Qi, Z. Liu, Y. Chen, *Angew. Chem. Int. Ed.*, 2020, **59**, 4793.
- S96. C. Zhao, J. Liu, N. Yao, J. Wang, D. Ren, X. Chen, B. Li, Q. Zhang, *Angew. Chem. Int. Ed.*, 2021, **60**, 15281.
- S97. Y. Zhang, H. Qin, M. Alfred, H. Ke, Y. Cai, Q. Wang, F. Huang, B. Liu, P. Lv, Q. Wei, *Energy Stor. Mater.*, 2021, **42**, 88-96.
- S98. R. Chen, X. Xu, S. Peng, J. Chen, D. Yu, C. Xiao, Y. Li, Y. Chen, X. Hu, M. Liu, H. Yang, I. Wyman, and X. Wu, *ACS Sustain. Chem. Eng.*, 2020, **8**, 11501.
- S99. G. Kresse and J. Hafner, *Phys. Rev. B.*, 1993, **48**, 13115-13118.
- S100. G. Kresse and J. Hafner, *Phys. Rev. B.*, 1994, **49**, 14251-14269.
- S101. G. Kresse and J. Furthmuller, *Comp. Mater. Sci.*, 1996, **6**, 15-50.
- S102. G. Kresse and J. Furthmuller, *Phys. Rev. B.*, 1996, **54**, 11169-11186.
- S103. P. E. Blochl, *Phys. Rev. B.*, 1994, **50**, 17953-17979.
- S104. G. Kresse, D. Joubert, *Phys. Rev. B.*, 1999, **59**, 1758.
- S105. J. P. Perdew, K. Burke, *Phys. Rev. Lett.*, 1996, **77**, 3865.
- S106. S. Dudarev, G. Botten, S. Savrasov, C. Humphreys and A. Sutton, *Phys. Rev. B.*, 1998, **57**, 1505-1509.

S107. H. Monkhorst, and J. Pack, *Phys. Rev. B.*, 1976, **13**, 5188.

S108. G. Henkelman, A. Arnaldsson, H. Jonsson, *Comput. Mater. Sci.*, 2006, **36**, 354-360.
